1 **Title: *Arabidopsis* CONSERVED BINDING OF EIF4E1 negatively regulates the**  
2 **NADPH oxidase RESPIRATORY BURST OXIDASE HOMOLOG D**

3

4 **Authors:** Jeffrey George<sup>1,2,a</sup>, Martin Stegmann<sup>1,b</sup>, Jacqueline Monaghan<sup>1,c</sup>, and Cyril  
5 Zipfel<sup>1,2\*</sup>

6 **Affiliations:**

7 <sup>1</sup>The Sainsbury Laboratory, University of East Anglia, Norwich Research Park,  
8 Norwich, United Kingdom.

9 <sup>2</sup>Institute of Plant and Microbial Biology and Zürich-Basel Plant Science Center,  
10 University of Zürich, Zürich, Switzerland.

11 <sup>a</sup>Present address: Center for Plant Cell Biology, Department of Botany and Plant  
12 Sciences, University of California, Riverside, Riverside, CA, USA.

13 <sup>b</sup>Present address: Phytopathology, TUM School of Life Sciences, Technical  
14 University of Munich, Freising, Germany.

15 <sup>c</sup>Present address: Department of Biology, Queen's University, Kingston K7L 3N6,  
16 Ontario, Canada.

17 \*Corresponding author: [cyril.zipfel@botinst.uzh.ch](mailto:cyril.zipfel@botinst.uzh.ch)

18

## 19 **Summary**

20 Cell-surface pattern recognition receptors sense invading pathogens by binding  
21 microbial or endogenous elicitors to activate plant immunity. These responses are under  
22 tight control to avoid excessive or untimely activation of cellular responses, which may  
23 otherwise be detrimental to host cells. How this fine-tuning is accomplished is an area of  
24 active study. We previously described a suppressor screen that identified *Arabidopsis*  
25 *thaliana* mutants with regained immune signaling in the immunodeficient genetic  
26 background *bak1-5*, which we named *modifier of bak1-5 (mob)* mutants. Here, we  
27 report that *bak1-5 mob7* restores elicitor-induced signaling. Using a combination of  
28 map-based cloning and whole-genome resequencing, we identified *MOB7* as  
29 *CONSERVED BINDING OF EIF4E1 (CBE1)*, a plant-specific protein that interacts with  
30 highly-conserved eukaryotic translation initiation factor eIF4E1. Our data demonstrate  
31 that CBE1 regulate the accumulation of RESPIRATORY BURST OXIDASE HOMOLOG  
32 D (RBOHD), the NADPH oxidase responsible for elicitor-induced apoplast reactive  
33 oxygen species (ROS) production. Furthermore, several mRNA decapping and  
34 translation initiation factors co-localize with CBE1 and similarly regulate immune  
35 signaling. This study thus identifies a novel regulator of immune signaling and provides  
36 new insights into ROS regulation, and more generally translational control during plant  
37 stress responses.

38

## 39 **Introduction**

40 The restriction of invading organisms is governed by passive and active defenses,  
41 which are effective against all types of plant pathogens and pests, including viruses,  
42 insects, nematodes, and parasitic plants<sup>1</sup>. On the cell surface, conserved microbial  
43 molecules called pathogen- or microbe-associated molecular patterns (PAMPs/MAMPs)  
44 or plant-derived damage-associated molecular patterns and phytochemicals (hereafter,  
45 generally referred to as elicitors) are recognized by pattern recognition receptors  
46 (PRRs)<sup>2,3</sup>. For example, in *Arabidopsis thaliana* (hereafter *Arabidopsis*), the PRRs  
47 FLAGELLIN SENSING 2 (FLS2), EF-TU RECEPTOR (EFR), and PEP1 RECEPTOR 1  
48 (PEPR1) and PEPR2 recognize bacterial flagellin (cognate ligand, flg22), bacterial EF-  
49 Tu (cognate ligand, elf18), and the endogenous Atp1 (and related peptides),

50 respectively<sup>4-6</sup>. These PRRs interact with the common co-receptor  
51 BRASSINOSTEROID INSENSITIVE 1-ASSOCIATED KINASE 1 (BAK1) in a ligand-  
52 dependent manner<sup>7-9</sup>. Following heterodimerization, numerous cell signaling events are  
53 initiated, including activation of receptor-like cytoplasmic kinases (RLCKs), production of  
54 apoplastic reactive oxygen species (ROS) by the NADPH oxidase RESPIRATORY  
55 BURST OXIDASE HOMOLOG D (RBOHD), altered ion fluxes, activation of calcium-  
56 dependent protein kinases (CDPKs), mitogen-activated protein kinase (MAPK)  
57 cascades, callose deposition, and large-scale transcriptional programming<sup>10,11</sup>. To  
58 maintain immune homeostasis, plants use multiple strategies to adjust the amplitude  
59 and duration of immune responses<sup>11</sup>. These include limiting the ability of PRRs to recruit  
60 their cognate co-receptors, regulation of signaling initiation and amplitude at the level of  
61 PRR complexes (*i.e.* post-translational modifications, protein turn-over), monitoring of  
62 cytoplasmic signal-transducing pathways, and control of transcriptional  
63 reprogramming<sup>11</sup>.

64 To identify loci involved in plant immunity, a forward genetic screen was  
65 previously conducted in the immunodeficient mutant *bak1-5*, called the *modifier of bak1-5*  
66 *(mob)* screen<sup>12</sup>. This EMS-induced suppressor screen of *bak1-5* phenotypes identified  
67 10 mutants in nine allelic groups, named *mob1* to *mob10*, with partially restored elicitor-  
68 induced ROS production<sup>12-14</sup>. Through this suppressor screen, novel regulators of  
69 immune signaling have been discovered. *MOB1* and *MOB2* encode CALCIUM-  
70 DEPENDENT PROTEIN KINASE 28 (CPK28), which negatively regulates immune  
71 signaling by controlling the accumulation of the RLCK BOTRYTIS-INDUCED KINASE 1  
72 (BIK1), a central kinase involved in immune signaling downstream of multiple  
73 PRRs<sup>12,15,16</sup>. *MOB4* encodes CONSTITUTIVE ACTIVE DEFENSE 1 (CAD1)<sup>13</sup>. CAD1 is  
74 involved in immunity at different levels by controlling programmed cell death and  
75 regulating the homeostasis of the phyllosphere microbial community<sup>17,18</sup>. *MOB6*  
76 corresponds to SITE-1 PROTEASE (S1P), which controls the maturation of the  
77 endogenous RAPID ALKALINIZATION FACTOR 23 (RALF23) peptide to regulate  
78 immune signaling via the receptor kinase FERONIA<sup>14,19,20</sup>. Hence, we predict that the  
79 identification of remaining *MOB* genes will continue to unravel mechanisms of immune  
80 regulation.

81 Here, we report that MOB7 corresponds to CONSERVED BINDING OF EIF4E1  
82 (CBE1), a plant-specific protein that associates with the 5' mRNA cap<sup>21</sup> and the  
83 translation initiation factor eIF4E1<sup>22</sup>. We show that CBE1 co-localizes with  
84 ribonucleoprotein complexes, and that *cbe1* and other translational regulator mutants  
85 display enhanced accumulation of RBOHD protein, resulting in enhanced anti-bacterial  
86 immunity and ROS production, possibly through translational control of RBOHD protein  
87 levels.

88

## 89 Results

### 90 The *mob7* mutation rescues *bak1-5* immuno-deficiency

91 In the present study, we describe and characterize the *mob7* mutation. First, we  
92 confirmed that the *mob7* mutation was maintained in the M<sub>5</sub> generation as *bak1-5 mob7*  
93 mutants displayed restored ROS production in seedlings upon treatment with the  
94 elicitors elf18 and flg22 (Figure 1A). In addition, the *mob7* mutation restored ROS  
95 production in adult leaves upon elicitation with elf18, Atpep1, and chitin; however, no  
96 difference was observed with flg22 (Figure 1B; Figure S1A-D). Despite rescuing the  
97 ROS phenotype quantitatively, *mob7* did not restore the delayed peak of ROS burst  
98 observed in *bak1-5* (Figure S1A-E). A late immune output triggered by several elicitors  
99 is the inhibition of seedling growth<sup>10</sup>. While seedling growth inhibition is largely blocked  
100 in *bak1-5* mutants<sup>9,23</sup>, it was restored in *bak1-5 mob7* upon prolonged exposure with  
101 elf18, flg22, or Atpep1, while mock-treated seedlings grew similar to wild-type (WT) Col-  
102 0 (Figure 1C; Figure S1F). Furthermore, immunity to the hypovirulent bacterial strain  
103 *Pseudomonas syringae* pathovar *tomato* (*Pto*) DC3000 *COR* was restored in *bak1-5*  
104 *mob7* compared to *bak1-5* (Figure 1D). Altogether, these results show that *mob7*  
105 partially restores immunity in *bak1-5*.

106

### 107 Identification of *MOB7* as *CBE1*

108 Using the elicitor-induced ROS phenotype of *mob7* and map-based cloning of the F<sub>2</sub>  
109 population from the outcross of *bak1-5 mob7* (Col-0 ecotype) with Ler-0, linkage  
110 analysis revealed 3 regions of interest (Figure S2). Whole-genome resequencing of



111 bulked F<sub>2:3</sub> segregants that rescued seedling growth inhibition with 1  $\mu$ M Atp<sub>ep1</sub>  
112 identified a single nucleotide polymorphism in *AT4G01290*, a gene that encodes  
113 CONSERVED BINDING OF EIF4E1 (CBE1) (Figure 2A). The G to A transition is  
114 located at the last nucleotide of the second exon (Figure 2B; Figure S3A), which leads  
115 to a premature stop codon resulting in reduced *CBE1* expression and the production of  
116 a truncated protein (Figure 2C; Figure S3A). It is possible that the premature stop codon  
117 in *mob7* is recognized by the nonsense-mediated mRNA decay (NMD) machinery,  
118 which links premature translation termination to mRNA degradation<sup>24</sup>. Knock-down  
119 alleles from independent T-DNA insertions in *CBE1* phenocopied the increased elf18-  
120 induced ROS production and normal growth observed in *mob7* single mutant (Figure  
121 3A; Figure S3A-D), while WT segregants from these T-DNA lines have the same  
122 phenotype as Col-0 (Figure 3A; Figure S3A-C). We thus feel confident that the mutation  
123 we identified in *CBE1* explains the *mob7* phenotypes.

124

### 125 **CBE1 is a negative regulator of elicitor-induced ROS production and immunity**

126 While mutation of *CBE1* results in increased ROS production induced by various  
127 elicitors (Figure 3A; Figure S4A), and enhanced immunity to *Pto* DC3000 (Figure 3B),  
128 we did not observe any differences in seedling growth inhibition or MAPK activation  
129 between different *cbe1* alleles and Col-0 (Figure 3C,D; Figure S4B). Given the apparent  
130 specific impact of *cbe1* mutations on ROS production, we tested whether transcripts  
131 and/or protein levels for the NADPH oxidase RBOHD were affected. Interestingly, while  
132 no significant reproducible difference could be observed at the transcript level (Figure  
133 3F: ref. 22), RBOHD protein accumulation was consistently higher in *cbe1* mutants  
134 (Figure 3E). These results indicate that CBE1 regulates RBOHD post-transcriptionally  
135 or co/post-translationally, which could thus explain the effect on ROS production and  
136 immunity.

137

### 138 **CBE1 co-localizes with ribonucleoprotein complexes**

139 As CBE1 is known to interact with the translation initiation factors eIF4E and eIFiso4E<sup>22</sup>,  
140 which localize to ribonucleoprotein complexes associated with the 5' cap of mRNA  
141 transcripts, we were interested to investigate the subcellular localization of CBE1. When

142 transiently expressed in *Nicotiana benthamiana*, CBE1-GFP displays a nucleo-  
143 cytoplasmic subcellular distribution, additionally localizing to distinct cytoplasmic foci  
144 (Figure 4A). Comparatively, while CBE1<sup>mob7</sup>-GFP similarly localizes to the cytoplasm  
145 and nucleus, localization in cytoplasmic foci is not apparent (Figure 4B). To investigate  
146 the localization of CBE1 within cytoplasmic foci, colocalization was measured using  
147 Pearson correlation coefficient with different ribonucleoprotein complex markers<sup>25</sup>.  
148 Active translation is located within polysomes while processing bodies (P-bodies) and  
149 stress granules are generally associated with decay and storage of mRNA,  
150 respectively<sup>26</sup>. To differentiate those different sub-complexes, we used marker proteins.  
151 Associated with P-bodies, DECAPPING 1 (DCP1)<sup>27</sup> is a member of the decapping  
152 complex, which is responsible for removal of the 5' cap, while UP-FRAMESHIFT  
153 SUPPRESSOR 1 (UPF1)<sup>28</sup> is a factor of NMD. Although generally associated with  
154 active translation within polysomes, the translation initiation factor eIF4E<sup>29</sup> and POLY(A)  
155 BINDING PROTEIN 2 (PAB2)<sup>30</sup> also localize to stress granules, together with the RNA  
156 binding proteins OLIGOURIDYLATE BINDING PROTEIN 1B (UBP1B)<sup>30</sup> and RNA  
157 BINDING PROTEIN 47C (RBP47C)<sup>29</sup>. We observed the highest co-localization  
158 correlation between CBE1 and DCP1 as well as partial co-localization between CBE1  
159 and UPF1 (Figure 4C; Figure S5). To a lesser extent, CBE1 also co-localized with  
160 polysomes and stress granule markers eIF4E, UBP1B, RBP47C, and PAB2 (Figure 4C;  
161 Figure S5). This indicates that CBE1 co-localizes with ribonucleoprotein complexes and  
162 suggests a role for CBE1 in P-bodies.

163

#### 164 **RBOHD accumulation is affected in mutants of additional translation factors**

165 We next tested if RBOHD accumulation and subsequent immune outputs are affected in  
166 mutants lacking components of the translation initiation complex (*i.e.* eIF4E1, eIFiso4E,  
167 eIF4G, eIFiso4G1/2)<sup>31</sup>, or P-bodies (*i.e.* PAT1)<sup>32</sup>. As PAT1 was shown to be guarded by  
168 the nucleotide-binding site leucine-rich repeat receptor (NLR) SUPPRESSOR OF MKK1  
169 MKK2 2 (SUMM2)<sup>32</sup>, the double mutant *pat1-1 summ2-8* was also analyzed together  
170 with the single mutants *pat1-1* and *summ2-8*. Similar to *cbe1-1*, *eif4e1* and *pat1*  
171 mutants, and to a lesser extent *eif4g*, showed a similar ROS phenotype upon elicitor  
172 treatment (Figure 5A). Accordingly, *eif4e1* and *pat1-1* mutants also displayed an

173 increase in RBOHD protein level similar to *cbe1* (Figure 5B,C), suggesting that RBOHD  
174 may be regulated by these factors.

175

176

177

## 178 **Discussion**

179 Immune signaling relies on tight regulation to allow a proportionate and timely  
180 response<sup>11,33</sup>. Here, we report that CBE1 contributes to RBOHD protein accumulation  
181 and consequently elicitor-induced ROS production and anti-microbial immunity.  
182 Similarly, mutants of the decapping factor PAT1 and the translation initiation factor  
183 eIF4E phenocopied *cbe1*. Overall, this suggests that CBE1, PAT1, and eIF4E regulate  
184 RBOHD levels, either post-transcriptionally or co/post-translationally, and thereby affect  
185 elicitor-induced ROS production. Translational regulation of plant immunity has recently  
186 been proposed, as elicitor perception induces global translational reprogramming<sup>34–36</sup>  
187 and remodeling of the cellular RNA-binding proteome<sup>37</sup>. Notably, some of these RNA-  
188 binding proteins (RBPs) control transcripts encoding important immune signaling  
189 components. For example, alternative splicing targets genes encoding PRRs, kinases,  
190 transcription factors, and NLRs<sup>38–45</sup>. In addition, the decapping and deadenylation  
191 protein complex as well as NMD factors have been shown to regulate stress-responsive  
192 transcripts<sup>46–51</sup>. Accordingly, these changes at the level of RBPs and transcripts  
193 contribute to plant immune responses against viruses (which depend on host  
194 translation) and other pathogens<sup>37,50,51</sup>.

195 ROS play an important role for biological processes such as plant development  
196 and responses to abiotic and biotic stresses, but are also extremely reactive and toxic at  
197 high levels, making its regulation critical to homeostasis<sup>52</sup>. Fine-tuning of ROS  
198 production and accumulation happens at different levels in space and time<sup>52</sup>, including  
199 post-translational modification of NAPDH oxidases. For instance, the most highly  
200 expressed NAPDH oxidase, RBOHD, is actively regulated to fine tune ROS production  
201 to permit growth, signaling and development while avoiding toxicity at high level<sup>52–57</sup>.  
202 Recently, post-translational modifications through phosphorylation and ubiquitination of  
203 RBOHD were shown to regulate its accumulation during immunity<sup>57</sup>. Our work here

204 suggests that CBE1 and other translational regulators represent another layer of  
205 regulation of RBOHD protein accumulation; however, the mechanistic details underlying  
206 it remains unknown. This study nevertheless further emphasizes the importance of  
207 regulating ROS production through modulation of RBOHD. Investigating if CBE1 binds  
208 *RBOHD* transcripts directly, or binds other transcripts whose products regulate RBOHD  
209 levels, will be important to further understand the role of CBE1. In order to determine if  
210 this is part of a regulated attenuation mechanism, it will also be necessary to determine  
211 if RBOHD is under immune-induced translational control. Interestingly, recent results  
212 demonstrated that during immune signaling, *RBOHD* transcripts increased in the set of  
213 ribosome-loaded mRNAs<sup>58</sup>. However, the role of CBE1 in that process is still unknown,  
214 and expressing CBE1 in plants and bacteria has proven challenging<sup>22</sup>. Accordingly, we  
215 failed to generate stable Arabidopsis transgenic lines expressing epitope-tagged CBE1  
216 despite multiple attempts (Table S2); highlighting the importance of generating novel  
217 tools to answer these questions in future studies.

218         Based on previous work showing the association between CBE1 and eIF4E1<sup>22</sup>,  
219 as well as the co-localization and mutant analysis presented here, we suggest that  
220 CBE1 might work together with decapping factor DCP1 and translation initiation factor  
221 eIF4E1 to regulate RBOHD protein level and consequently elicitor-induced ROS  
222 production and immunity. We found that mutants lacking initiation factor *eif4e* showed  
223 similar sensitivity to *elf18* as *cbe1*, whereas mutants in other initiation factors (*eif4iso4e*  
224 and *eifiso4g1 eifiso4g2*) were similar to WT. These results are in accordance with the  
225 specificities of the different eIF isoforms, which bind the 5' mRNA cap with a range of  
226 affinities<sup>59,60</sup>. We also observed enhanced *elf18*-induced ROS and RBOHD  
227 accumulation in *pat1-1*, which is surprising as eIF4E1 and PAT1 are predicted to  
228 function antagonistically. Indeed, eIF4E initiates recruitment of the initiation complex  
229 and subsequent recruitment of ribosomes, while PAT1 contributes to decapping, which  
230 initiates 5'-3' decay by exoribonucleases<sup>32</sup>. In addition, CBE1 seems to localize  
231 predominantly to P-bodies, which are generally associated with mRNA decay<sup>61</sup>.  
232 Interestingly, the number of P-bodies increases when Arabidopsis is treated with  
233 *flg22*<sup>32,50</sup>, suggesting a link between P-body-mediated mRNA stability and immunity.  
234 Given that CBE1 is a plant-specific and non-essential protein, it has been proposed to

235 regulate targeted transcripts in a context-dependent manner<sup>22</sup>, which could conceivably  
236 provide a fine-tuning mechanism to regulate gene expression. Further work is needed to  
237 understand how CBE1 functions in translation initiation and/or mRNA decay.

238

239

#### 240 **Author contributions**

241 J.G., M.S, J.M., and C.Z. conceived and designed the project. J.G., M.S, J.M. generated  
242 materials, performed experiments, and analyzed data. J.G. and C.Z. wrote the  
243 manuscript with input from all authors.

244

#### 245 **Acknowledgments**

246 This work was funded by The Gatsby Charitable Foundation (to C.Z.), The  
247 Biotechnology and Biological Research Council (BB/P012574/1), the University of  
248 Zürich (to C.Z.), and the Swiss National Science Foundation grant no. 31003A\_182625  
249 (to C.Z.). M.S. was supported by the Deutsche Forschungsgemeinschaft (Fellowship  
250 STE 2448/1 to M.S.), and J.M. by the European Molecular Biology Organization  
251 (Fellowships ALTF 459-2011). The authors thank Jonathan Jones (The Sainsbury  
252 Laboratory) for his input on the project, as well as Marta Bjornson, Julien Gronnier and  
253 all members of the Zipfel lab for fruitful discussion and feedback on the manuscript. The  
254 authors thank Julia Bailey-Serres for her input on the manuscript. The authors thank the  
255 John Innes Centre horticultural staff and Tamaryn Ellick (Institute of Plant and Microbial  
256 Biology) for assistance with plant growth. We also thank Karen Browning (The  
257 University of Texas at Austin) for providing the *cbe1-1*, *cum1-1*, *eif4g*, *eifiso4e*, *eifiso4g1*  
258 *eifiso4g2* mutants; Morten Petersen (University of Copenhagen) for the *pat1-1*, *summ2-*  
259 *8*, *pat1-1 summ2-8* mutants; Martin Hülskamp (University of Cologne) for the *p35S-*  
260 *mCherry-PAB2*, *p35S-YFP-UBP1B*, *p35S-YFP-EIF4E1*, *p35S-YFP-RBP47C* constructs;  
261 and Martin Crespi (Institute of Plant Sciences Paris-Saclay) for the *p35S-mRFP1-UPF1*,  
262 *p35S-mRFP1-DCP1* constructs.

263

264 **Declaration of interests**

265 The authors declare no competing interests.

266

267

268

269 **Main figure titles and legends**

270 **Figure 1. *mob7* restores immune signalling in *bak1-5*.**

271 (A-B) Total ROS accumulation measured as relative light units (RLU) over 60 min  
272 recording after treatment with the corresponding elicitors on (A) 2-week-old seedlings  
273 (n=12-16) or (B) leaf discs from 5-week-old leaves (n=4-8). Horizontal lines represent  
274 the means from 3 independent experiments (n=4-8) (C) Growth inhibition is represented  
275 as relative fresh weight compared to untreated seedlings in response to the indicated  
276 elicitors. Horizontal lines represent the means from 2 independent experiments (n=12-  
277 17). (D) Bacterial growth (colony-forming unit - CFU/cm<sup>2</sup>) in leaves spray-inoculated  
278 with 10<sup>7</sup> CFU/mL (OD<sub>600</sub> = 0.2) *P. syringae* pv. *tomato* (Pto) DC3000 *COR*<sup>-</sup> and sampled  
279 at 3 dpi. Horizontal lines represent the means from 4 independent experiments (n=4-8).  
280 (A-D) Symbol colors indicate different experiments. Numbers above symbols are p-  
281 values from (A, B, C) Dunn's or (D) Dunnett's multiple comparison test between  
282 corresponding genotypes and *bak1-5*.

283

284 **Figure 2. *mob7* mutation maps to *CONSERVED BINDING OF EIF4E1* resulting in a**  
285 **truncated protein.**

286 (A) Density plot of SNPs at the top arm of chromosome 4 using CandiSNP software  
287 (Etherington *et al.*, 2014). SNPs with an allele frequency below 60% were removed from  
288 the plots. Non-synonymous SNPs are shown in red and others in grey. Grey rectangles  
289 indicate the centromere. The dashed area delimits several non-synonymous SNPs in  
290 transposable element genes. Mbp, mega base pairs. (B) The *mob7* mutation leads to a  
291 premature stop codon within the intron downstream of exon 3. The top symbols delimit  
292 nucleotides from exons 3, 4 and intron within *AT4G01290*. The number indicates the



293 nucleotide position relative to the adenosine of the start codon. The second line shows  
294 amino acids corresponding to codons above. The EMS-induced SNP in *mob7* is  
295 indicated in red. Star indicates a stop codon. (C) Immunoblot analysis using anti-GFP  
296 after transient expression in *N. benthamiana*. Coomassie Brilliant Blue (CBB) stain is  
297 shown as loading control. Experiment was repeated once with similar results.

298

299 **Figure 3. CBE1 negatively regulates elicitor-induced ROS production and RBOHD**  
300 **protein levels.**

301 (A) Total ROS accumulation measured as RLU over 60 min recording after treating leaf  
302 discs from 5-week-old plants with 100 nM elf18. Horizontal lines represent the means  
303 from 3 independent experiments (n=8). (B) Bacterial growth (CFU/cm<sup>2</sup>) in leaves spray  
304 inoculated with 10<sup>7</sup> CFU/mL (OD<sub>600</sub> = 0.2) *P. syringae* pv. *tomato* DC3000 and sampled  
305 at 3 dpi. Horizontal lines represent the means from 3 independent experiments (n=9).  
306 (C) Growth inhibition represented as percentage of fresh weight in response to 1, 10 or  
307 100 nM elf18 relative to mock treated seedlings. Horizontal lines represent the means  
308 from 3 independent experiments (n=16). (D) Immunoblot analysis of elf18-induced  
309 MAPK phosphorylation using anti-phospho-p44/42 in leaf discs from 5-week-old  
310 Arabidopsis leaves treated with 1 μM elf18 for the indicated time. Coomassie Brilliant  
311 Blue (CBB) stain is shown as loading control. Experiment was repeated twice with  
312 similar results. (E) Immunoblot analysis of RBOHD (anti-RBOHD) and BAK1 (anti-  
313 BAK1) protein accumulations in 5-week-old Arabidopsis leaves from corresponding  
314 genotypes. Coomassie Brilliant Blue (CBB) stain is shown as loading control.  
315 Experiment was repeated twice with similar results. (F) qRT-PCR of *RBOHD* transcripts  
316 in corresponding genotypes. Expression values relative to the *U-BOX* housekeeping  
317 gene are shown. Horizontal lines represent the means from 2 independent experiments  
318 (n=1-2). Numbers above symbols are p-values from (A, B) Dunnett's or (C, F) Dunn's  
319 multiple comparison test between corresponding genotype and *bak1-5*.

320

321 **Figure 4. CBE1 localizes predominantly to processing bodies among**  
322 **ribonucleoprotein complexes.**



323 (A, B) Confocal images of CBE1-GFP (A) or CBE1<sup>mob7</sup>-GFP (B) after transient  
324 expression in *N. benthamiana*. Each picture is az-stack projection. The scale bar  
325 corresponds to 20  $\mu\text{m}$ . (C) Quantitative co-localization analysis for CBE1 with  
326 polysomes / stress granules (SG), SG specific and P-bodies (PB) markers after  
327 transient co-expression in *N. benthamiana*. The Pearson correlation coefficient (R) was  
328 calculated with five ROIs ( $25 \mu\text{m}^2$ ) per image (n=5, images) and the proteins underlined  
329 refer to the channel used to draw the ROIs.

330

331 **Figure 5. Translation factor eIF4E and decapping factor PAT1 also play a role in**  
332 **ROS production.**

333 (A) Total ROS accumulation measured as RLU over 60 min recording after treatment  
334 with 100 nM elf18 on leaf discs from 5-week-old plants: Horizontal lines represent the  
335 means from 3 independent experiments (n=8-12). The symbol colors indicate the  
336 different experiments. Numbers above symbols are p-values from Dunn's multiple  
337 comparison test between the corresponding genotypes and Col-0. (B) Immunoblot  
338 analysis of RBOHD (anti-RBOHD) protein accumulations in 5-week-old Arabidopsis  
339 leaves from the corresponding genotypes. Coomassie Brilliant Blue (CBB) stain is  
340 shown as loading control. Experiment was repeated twice with similar results.

341

342 **STAR Methods text**

343 **Plant materials and growth conditions**

344 *Arabidopsis thaliana* plants were grown on soil as one to four plants per pot (7 x 7 cm)  
345 in controlled environment rooms maintained at 20 °C with a 10-h photoperiod and 60%  
346 humidity, or as seedlings on sterile Murashige and Skoog (MS) media supplemented  
347 with vitamins and 1%(w/v) sucrose (Duchefa) with a 16-h photoperiod. Assays using  
348 soil-grown plants were performed at 4 to 6 weeks post-germination (wpg), before the  
349 reproductive transition. Assays using plate-grown seedlings were performed at 2 wpg.  
350 *A. thaliana* ecotype Columbia-0 (Col-0) was used as a wild-type control for all plant  
351 assays and was the background for all mutants used in this study, except otherwise  
352 stated. The *bak1-5 mob7* mutants were purified by one backcross to *bak1-5*. The single

353 *mob7* mutant was obtained by crossing *bak1-5 mob7* to Col-0. Knock-down alleles  
354 *cbe1-2* (AT4G01290; SALK\_038452), *cbe1-3* (AT4G01290; GK\_150\_H09), and wild-  
355 type alleles denoted *CBE1-2*, *CBE1-3* derived from segregation of SALK\_038452 and  
356 GK\_150\_H09, respectively, were obtained through the Nottingham Arabidopsis Stock  
357 Centre (NASC). Ecotype Landsberg *erecta* (*Ler-0*) and *rbohD* (SLAT line)<sup>62</sup>, *bak1-5*  
358 (EMS mutant)<sup>23</sup> mutants were available in-house. Genotypes *cbe1-1*  
359 (*WiscDsLoxHs188\_10F*)<sup>22</sup>, *elf4e1* (*cum1-1*)<sup>63</sup>, *elf4g* (SALK\_80031)<sup>22</sup>, *elfiso4e* (SLAT  
360 line)<sup>64</sup>, double mutant *elfiso4g1 elfiso4g2* (from those two SALK lines: SALK\_009905,  
361 SALK\_076633)<sup>65</sup> were obtained from Karen Browning. Genotypes *pat1-1*  
362 (SALK\_040660), *summ2-8* (SAIL\_1152A06), *pat1-1 summ2-8*<sup>32</sup> were obtained from  
363 Morten Petersen.

364 *Nicotiana benthamiana* plants were grown on soil as one plant per pot (8 x 8 cm) at 25  
365 °C during the day with 16 h light and at 22 °C during the night (8 h). Relative humidity  
366 was maintained at 60%.

367

### 368 **Map-based cloning and whole-genome sequencing**

369 The *bak1-5 mob7* mutant (in Col-0) was crossed to *Ler-0*. Fifty-six F<sub>2</sub> segregants were  
370 genotyped for *bak1-5* using a dCAPS marker (Table S1). Homozygous *bak1-5*  
371 segregants were phenotyped for elf18-induced ROS production similar to *mob7*.  
372 Linkage analysis was performed using an array of genome-wide markers designed in-  
373 house or by the Arabidopsis Mapping Platform (Table S1)<sup>66</sup>. For whole-genome  
374 sequencing, 440 F<sub>2</sub> plants from the cross *bak1-5 mob7* with *bak1-5* were scored for  
375 chitin-induced ROS production. One hundred thirty-three plants showed moderately  
376 increased, and 93 plants highly increased, ROS production. Out of these 93 plants, 70  
377 were tested in the F<sub>3</sub> generation, and only 15 showed a confirmed phenotype to restore  
378 Atpep1-induced seedling growth inhibition in 3 experiments. Thirty seedlings from each  
379 of the positive F<sub>3</sub> parents were bulked and ground to a fine powder in liquid nitrogen and  
380 gDNA extracted. Ground tissues were equilibrated in buffer containing 50 mM Tris-HCl  
381 (pH 8.0), 200 mM NaCl, 2 mM EDTA for 30 min at 37 °C with occasional mixing, and a  
382 further 20 min at 37 °C with 0.2 mg/mL RNase. Roughly 10 ng of genomic DNA was  
383 then extracted using a standard chloroform/phenol method and resuspended in TE

384 buffer (10 mM Tris HCl pH 7.5; 1 mM EDTA pH 8). Prepared gDNA of pooled *bak1-5*  
385 *mob7* F<sub>3</sub> segregants, as well as *bak1-5* as a reference, was submitted to The Beijing  
386 Genomics Institute (Hong Kong) for Illumina-adapted library preparation and paired-end  
387 sequencing using the High-Seq 2000 platform. The average coverage from Illumina  
388 sequencing of *bak1-5 mob7* over the nuclear chromosomes was 15.79. Paired-end  
389 reads were aligned to the TAIR10 reference assembly using BWA v 0.6.1 with default  
390 settings<sup>67</sup>. BAM files were generated using SAMTools v 0.1.8<sup>67</sup> and single-nucleotide  
391 polymorphisms (SNPs) were called using the mpileup command. High-quality SNPs  
392 were obtained using the filters (1) Reads with mapping quality less than 20 were  
393 ignored; (2) SNP position had a minimum coverage of 6 and a maximum of 250; (3) the  
394 reference base must be known; and (4) SNPs were present in *bak1-5 mob7* but not in  
395 the *bak1-5* control. The resulting pileup files contained a list of SNPs and their genomic  
396 positions. SNPs unique to *bak1-5 mob7* and not present in the *bak1-5* control were  
397 identified. SNPs passing filters were analyzed on CandiSNP<sup>68</sup>. Relevant SNPs were  
398 confirmed in the original *bak1-5 mob7* mutant and backcrossed lines by Sanger  
399 sequencing of PCR amplicons.

400

#### 401 **Elicitors**

402 The following elicitors were used in this study: chitin (Yaizu Suisankagaku Industry),  
403 flg22 peptide (CKANSFREDRNEDEV)<sup>69</sup>, elf18 peptide (ac-  
404 SKEKFERTKPHVNVGTIG)<sup>70</sup>, and Atpep1 peptide  
405 (ATKWKAKQRGKEKVSSGRPGQHN)<sup>71</sup>. All peptides were synthesized by SciLight-  
406 peptide (China) with purity above 95% and dissolved in sterile distilled water.

407

#### 408 **Oxidative burst assay**

409 Reactive oxygen species (ROS) production was measured as previously described<sup>23</sup>.  
410 For the assay, either adult plants (4- to 6-week-old plants) or seedlings (2-week-old)  
411 were used. For adult plants, leaf discs (4-mm diameter) were collected using a biopsy  
412 punch and floated overnight on distilled, deionized water in a white 96-well plate to  
413 recover from wounding. For ROS assays on whole seedlings, seedlings were grown on  
414 MS agar plates for 5 d before being transferred to MS liquid medium in transparent 96-

415 well plates. After 8 d, seedlings were transferred to a white 96-well plate and allowed to  
416 recover overnight in sterile water. The water was then removed and replaced with  
417 elicitor solution containing 17 µg/mL luminol (Sigma-Aldrich), 100 µg/mL horseradish  
418 peroxidase (Sigma-Aldrich) and the indicated elicitor concentration. For seedlings, the  
419 hyperactive luminol derivative 0.5 µM L-012 (Fujifilm Wako Chemicals) was used  
420 instead of luminol. Luminescence was recorded over a 40- to 60-minute period using a  
421 charge-coupled device camera (Photek Ltd., East Sussex UK).

422

### 423 **Seedling growth inhibition assay**

424 Seedling growth inhibition was performed as previously described<sup>23</sup>. Sterilized and  
425 stratified seeds were sown on MS media and grown in controlled environment rooms  
426 with 16/8 h day/night cycle and constant temperature of 22 °C. Five-day-old seedlings  
427 were transferred into liquid MS with or without the indicated amount of elicitor. Ten to  
428 twelve days later, individual seedlings were gently dry-blotted and weighed using a  
429 precision scale (Sartorius).

430

### 431 **MAP kinase phosphorylation assay**

432 Phosphorylation of MAPKs was measured as previously described<sup>72</sup>. Leaf discs (4-mm  
433 diameter) from adult plants (4- to 6-week-old plants) were cut in the evening and left  
434 overnight on the bench, floating in 6-well plates on distilled, deionized water. In the  
435 morning, the elicitor peptide was added to the desired concentration, and tissue was  
436 blotted dry and flash-frozen in liquid nitrogen for protein extraction at the indicated time  
437 points. MAPK phosphorylation was detected by western blot using an antibody specific  
438 to the active phosphorylated form of the proteins (phospho-p44/42 MAPK). Fifteen leaf  
439 discs were used per condition.

440

### 441 **Bacterial spray inoculation**

442 Spray inoculations were performed as previously described<sup>73</sup>. *Pseudomonas syringae*  
443 pv. *tomato* (*Pto*) DC3000 wild-type and *COR*<sup>-</sup> (defective in production of the phytotoxin  
444 coronatine) strains<sup>74</sup> were grown in overnight culture in King's B medium supplemented  
445 with 50 µg/mL rifampicin, 50 µg/mL kanamycin and 100 µg/mL spectinomycin and

446 incubated at 28 °C. Cells were harvested by centrifugation and pellets resuspended in  
447 10 mM MgCl<sub>2</sub> to an OD<sub>600</sub> of 0.2, corresponding to 1x10<sup>8</sup> CFU/mL. Immediately before  
448 spraying, Silwet L-77 (Sigma Aldrich) was added to a final concentration of 0.04%(v/v).  
449 Four- to five-week-old plants were uniformly sprayed with the suspension and covered  
450 with a clear plastic lid for 3 d. Three leaf discs (4-mm diameter) were taken using a  
451 biopsy puncher from three respective leaves of one plant and ground in collection  
452 microtubes (Qiagen), containing one glass bead (3-mm diameter) and 200 µL water,  
453 using a 2010 Geno/Grinder (SPEX) at 1,500 rpm for 1.5 min. Ten microliters of serial  
454 dilutions from the extracts were plated on LB agar medium containing antibiotics and 25  
455 µg/mL nystatin (Melford). Colonies were counted after incubation at 28°C for 1.5 to 2 d.

456

### 457 **Molecular cloning**

458 Gateway-compatible fragments were amplified using Phusion Taq polymerase (New  
459 England Biolabs) from either Col-0 genomic DNA (*gCBE1*) containing 2.5 kb of the  
460 promoter sequence upstream of the translational start codon or from Col-0  
461 complementary DNA (*cCBE1*) or from complementary *mob7* DNA (*cCBE1<sup>mob7</sup>*) and with  
462 or without the endogenous stop codon. attB flanked PCR products were cloned into  
463 pDONR201 using the BP Clonase II (Invitrogen) and recombination was performed  
464 using the LR Clonase II (Invitrogen) into the corresponding destination vector  
465 (pK7WGF2.0, pK7FWG2.0, pGWB604, pUBC-GFP-Dest, pB7WGR2.0)<sup>75-77</sup>. All clones  
466 were verified by Sanger sequencing.

467

### 468 **Transient expression in *N. benthamiana***

469 *N. benthamiana* plants were used for transient transformation at 4- to 5-week post-  
470 germination. *Agrobacterium tumefaciens* GV3101 overnight cultures grown at 28 °C in  
471 low-salt LB were harvested by centrifugation at 2,500 x *g* and resuspended in buffer  
472 containing 10 mM MgCl<sub>2</sub> and 10 mM MES for 3 h at room temperature. *A. tumefaciens*-  
473 mediated transient transformation of *N. benthamiana* was performed by infiltrating  
474 leaves with OD<sub>600</sub> = 0.2 of each construct together with the viral suppressor P19 in a 1:1  
475 (or 1:1:1) ratio. Samples were collected 2-3 d after infiltration.

476

## 477 **Stable transformation of Arabidopsis**

478 Transgenic Arabidopsis plants were generated using floral dip method<sup>78</sup>. Briefly,  
479 flowering Arabidopsis plants were dipped into suspension culture of *Agrobacterium*  
480 *tumefaciens* GV3101 carrying the indicated plasmid. Plants carrying a T-DNA insertion  
481 event were selected either on MS medium containing the appropriate selection or as  
482 soil-grown seedlings by spray application of Basta (Bayer Crop Science).

483

## 484 **Confocal microscopy**

485 *N. benthamiana* leaf discs (4-mm diameter) transiently over-expressing the indicated  
486 proteins were sampled at 2-3 dpi with water as the imaging medium. Live-cell imaging  
487 employed a laser-scanning Leica SP5 Confocal Microscope (Leica Microsystems,  
488 Wetzlar, Germany) and 63x (glycerol immersion) objective. GFP was excited at 488 nm  
489 and emission detected between 496–536 nm (shown in green). YFP was excited at 514  
490 nm and detected between 524–551 nm (shown in yellow). RFP derivatives (mRFP,  
491 mCherry, tag-RFP) were excited at 561 nm and detected between 571-635 nm (shown  
492 in magenta). Co-localization was performed using sequential channel analysis by  
493 calculating Pearson's coefficient<sup>25,79</sup> using the coloc 2 plugin of ImageJ. Image analysis  
494 was performed with Fiji.

495

## 496 **Western blotting**

497 Antibodies used in western blots were as follows: anti-GFP 1:5000; Santa Cruz);  $\alpha$ -  
498 RFP-HRP (1:5000; Abcam); anti-mouse-HRP (1:15000; Sigma Aldrich); anti-rabbit-HRP  
499 (1:10000; Sigma Aldrich); anti-RBOHD (1:1000; Agrisera) and anti-phospho-p42/p44-  
500 erk (1:1000; Cell Signalling Tech).

501

## 502 **Statistical analysis**

503 Statistical analysis was performed using R (4.1.2) and Rstudio (2021.09.1) or GraphPad  
504 Prism (9.3). Based on Gaussian distribution parametric or nonparametric tests were  
505 chosen and when  $n \geq 30$ , normal distribution was assumed. Prior to multiple  
506 comparisons, ANOVA or Kruskal-Wallis test were performed to look for differences  
507 across groups. For multiple comparisons, Dunnett's and Dunn's tests were favored to



508 compare multiple groups to one control group. Tests were realized on the overall set of  
509 replicates and replicates were included only when positive and negative controls  
510 showed the expected results.

511

512

513

#### 514 **Supplemental item titles**

515

#### 516 **Figure S1. *mob7* restores immune signalling in *bak1-5*.**

517 (A-D) ROS burst kinetic measured as relative light units (RLU), in leaf discs following  
518 treatment with 100 nM elf18 (A) or 100 nM flg22 (B) or 500 nM Atpep1 (C) or 2 mg/mL  
519 chitin (D). Values are means + standard errors (n=8). (E) Tmax describes the time it  
520 takes for the ROS to peak upon treatment with corresponding elicitors over 60 min  
521 recording. Horizontal lines represent the means from 3 independent experiments (n=4-  
522 8). The symbol colors indicate the different experiments. Numbers above symbols are p-  
523 values from Dunn's multiple comparison test between corresponding genotype and  
524 *bak1-5*. (F) Images of 14-day-old seedlings grown in MS media or MS media containing  
525 100 nM elf18, 1  $\mu$ M flg22 or 1  $\mu$ M Atpep1.

526

#### 527 **Figure S2. Map-based cloning of *bak1-5 mob7*.**

528 Physical linkage map constructed using the F<sub>2</sub> population from *bak1-5 mob7* x Ler-0.  
529 The percentage represent the percentage of Col-0 alleles contributed by *bak1-5 mob7*.  
530 Plants were screened based on ROS production upon treatment with 100 nM elf18.  
531 Markers in grey are markers for which an increase of Col-0 alleles was also observed in  
532 plants with low elicitor-induced ROS production, thereby removed from further analysis.  
533 Markers in orange show linkage statistically higher than 50%. Circles represent  
534 centromeres. Significance was determined by  $\chi^2$  test.

535

#### 536 **Figure S3. Characterization of *cbe1* alleles.**



537 (A) Gene structure of *AT4G01290*. Exons are shown as grey boxes. T-DNA insertions  
538 are indicated with the respective name above and arrows indicate the orientation of the  
539 T-DNAs. EMS-induced *mob7* mutation with respective position and early stop codon are  
540 indicated in red. Fragments amplified by quantitative reverse-transcription polymerase  
541 chain reaction (RT-qPCR) are indicated in yellow. Bp, base pairs. (B, C) RT-qPCR of  
542 *AT4G01290* upstream of the T-DNA insertions/*mob7* mutation (B) or downstream of the  
543 insertions/mutation (C). (B,C) Expression values relative to the *U-BOX* housekeeping  
544 gene are shown. CBE1-2 and CBE1-3 are *CBE1* wildtype segregants from the *cbe1-2*  
545 and *cbe1-3* lines, respectively. Horizontal lines represent the means from 2  
546 independent experiments (n=2) (B,C) The symbol colours indicate the different  
547 experiments. Numbers above horizontal lines are p-values from Dunn's multiple  
548 comparison test between genotypes under the lines. (D) Rosette morphology of 5-week-  
549 old plants of the corresponding genotype.

550

#### 551 **Figure S4. CBE1 negatively regulates elicitor-induced ROS production.**

552 (A) Total ROS accumulation measured as RLU over 60 min recording after treatment  
553 with 100 nM flg22 on leaf discs from 5-week-old plants: Horizontal lines represent the  
554 means from 3 independent experiments (n=8). (B) Bacterial growth (CFU/cm<sup>2</sup>) in leaves  
555 spray inoculated with 10<sup>7</sup> CFU/mL (OD<sub>600</sub> =0.2) *P. syringae* pv. *tomato* DC3000 *COR*<sup>-</sup>  
556 and sampled at 3 dpi. Horizontal lines represent the means from 4 independent  
557 experiments (n=7-8). (C) Growth inhibition represented as percentage of fresh weight in  
558 response to 1, 10 or 100 nM flg22 relative to mock treated seedlings. Horizontal lines  
559 represent the means from 3 independent experiments (n=16). Numbers above symbols  
560 are p-values from (A,B) Dunnett's or (C) Dunn's multiple comparison test between  
561 corresponding genotype and *bak1-5*.

562

#### 563 **Figure S5. CBE1 localizes predominantly to processing bodies among** 564 **ribonucleoprotein complexes.**

565 Confocal images of green, yellow and red fluorescent proteins. The proteins were  
566 transiently co-expressed in *N. benthamiana*. Confocal microscopy on leaf discs was  
567 conducted 3 days post-infiltration. Merged pictures show overlay of GFP/YFP and RFP.

568 The scale bar corresponds to 20  $\mu\text{m}$ . An ROI of 25  $\mu\text{m}^2$  is shown by white square and  
 569 zoomed in on the top right of the images. P-bodies markers: UPF1, DCP1;  
 570 polysomes/stress granules markers: PAB2, EIF4E ; stress granules markers: UBP1B,  
 571 RBP47C.

572

573

574

575

576 **Table S1. Primers used in this study**

| Name       | Sequence (5'-3')           | Purpose           | Locus |
|------------|----------------------------|-------------------|-------|
| T10O24.F   | ATCAAAACTACGTCGTTTTA       | Map-based cloning |       |
| T10O24.R   | TTCAAATCAATCGAACATA        | Map-based cloning |       |
| F19G10.F   | ATGTCACCGTGAACGACATC       | Map-based cloning |       |
| F19G10.R   | TGCGAGTTAAGACCTAGGAG       | Map-based cloning |       |
| T3F24-2.F  | TCCACACACGCAACTTCATGGCAT   | Map-based cloning |       |
| T3F24-2.R  | TTACTTAGGTGACACGTGTGATGT   | Map-based cloning |       |
| T2E12.F    | CGACTAGCCAGTCCGATACA       | Map-based cloning |       |
| T2E12.R    | CGTTTTGGGAGCCACGTTTC       | Map-based cloning |       |
| F24J13-2.F | CTTGTA AAAACCTCGATATTATCTC | Map-based cloning |       |
| F24J13-2.R | ACTAAGATACTAGTAGGCTCGGCT   | Map-based cloning |       |
| T23K3.F    | CGTGTTTACCGGGTCGGA         | Map-based cloning |       |
| T23K3.R    | AAAACCCTTGAAGAATACG        | Map-based cloning |       |
| T4D8.F     | ATTAACCCCAATGATGCTGA       | Map-based cloning |       |
| T4D8.R     | AGCGGATAGATAATGGTCAA       | Map-based cloning |       |
| F2G1.F     | CGTCGTCGGAAGTTTCAGAG       | Map-based cloning |       |
| F2G1.R     | GAATAAGAAGAACACATGCGTC     | Map-based cloning |       |
| T8O18.F    | GATATGGATGTAACGACCCAA      | Map-based cloning |       |
| T8O18.R    | CAGCTTCGAGTGGATTCTAC       | Map-based cloning |       |
| T6A23.F    | ATGTCCAAATTGACCAACCG       | Map-based cloning |       |
| T6A23.R    | CAAAATAAACACCCCAACT        | Map-based cloning |       |
| T251P5.F   | CATCCGAATGCCATTGTTC        | Map-based cloning |       |
| T251P5.R   | AGCTGCTTCCTTATAGCGTCC      | Map-based cloning |       |
| MIE1.F     | CTAAGTTCCTCCACCATCTG       | Map-based cloning |       |
| MIE1.R     | CAAGGAGCATCTAGCCAGAG       | Map-based cloning |       |
| K13N2-3.F  | ATTAATCTAAAATCGAGTGATT     | Map-based cloning |       |
| K13N2-3.R  | AACAAACATTACTCGGTATCCAGT   | Map-based cloning |       |
| F18B3.F    | GTTCAATAA ACTTGCGTGTGT     | Map-based cloning |       |
| F18B3.R    | TACGGTCAGATTGAGTGATTC      | Map-based cloning |       |

|                 |                            |                   |           |
|-----------------|----------------------------|-------------------|-----------|
| F24B22.F        | CTGGGAACAAAGGTGTCATC       | Map-based cloning |           |
| F24B22.R        | CAAGGTCTCCAGAACACAAAC      | Map-based cloning |           |
| CIW5.F          | GGTTAAAAATTAGGGTTACGA      | Map-based cloning |           |
| CIW5.R          | AGATTTACGTGGAAGCAAT        | Map-based cloning |           |
| T419.F          | TTATAGCAAACGTACAAGTC       | Map-based cloning |           |
| T419.R          | CTGCATACACGTCGTCTC         | Map-based cloning |           |
| F24G24.F        | GCCAAACCCAAAATTGTAAAC      | Map-based cloning |           |
| F24G24.R        | TAGAGGGAACAATCGGATGC       | Map-based cloning |           |
| T4C9.F          | CAAAGGTTTCGTGTCGGAGC       | Map-based cloning |           |
| T4C9.R          | CGTTGACGGGATACTCGGTG       | Map-based cloning |           |
| T13J8.F         | ATGTTCCCAGGCTCCTTCCA       | Map-based cloning |           |
| T13J8.R         | GAGATGTGGACAAGTGACC        | Map-based cloning |           |
| F20M13.F        | TCTCGTAAGCAAATCAACGAATAG   | Map-based cloning |           |
| F20M13.R        | AAGATGCGTGCGTTGATGGACCAA   | Map-based cloning |           |
| K18J17-2.F      | GGTCCGAATCTAAACTCGGTTAAT   | Map-based cloning |           |
| K18J17-2.R      | AGTGTTTCGAGCAATAAGAGTGATT  | Map-based cloning |           |
| MQJ16.F         | TAGTGAACCTTTCTCAGAT        | Map-based cloning |           |
| MQJ16.R         | TTATGTTTTCTTCAATCAGTT      | Map-based cloning |           |
| MYJ24.F         | CTAATCCCAAGCTGAATCAC       | Map-based cloning |           |
| MYJ24.R         | TGACAGAGAATCCGACTGTG       | Map-based cloning |           |
| K15E6.F         | GGCTGCTTCACTGAGTTG         | Map-based cloning |           |
| K15E6.R         | AAAAGCCCATTTAAAACG         | Map-based cloning |           |
| K19E20.F        | GACAAGAACCACATGAGAGC       | Map-based cloning |           |
| K19E20.R        | GTTATGTGTACACTTCAGGTC      | Map-based cloning |           |
| MQJ2.F          | ATTCTCCGTAGACCACAG         | Map-based cloning |           |
| MQJ2.R          | TCAACAGACTCCGCATACT        | Map-based cloning |           |
| K9I9-1.F        | TGGACTTGAATAGTTAGGCTGTCT   | Map-based cloning |           |
| K9I9-1.R        | ATTACCAGTACTTAATAAAATGAT   | Map-based cloning |           |
| K4.542701.F     | TGTTGCTGTGAGACTCTATCC      | Mapping           |           |
| K4.542701.R     | TAGACAAGCAGACTTCATGCC      | Mapping           |           |
| AT4G01290.-1327 | CGAGATTTCCAAGGTGTGAGTCC    | Sequencing        | AT4G01290 |
| AT4G01290.-1106 | GTTGGTTGGTTTATTACACTCTAGG  | Sequencing        | AT4G01290 |
| AT4G01290.-679  | TCAATTTTACCTTCCCCTTTGAGAG  | Sequencing        | AT4G01290 |
| AT4G01290.-355  | TTCATCTTTTCCCGATTTGAGG     | Sequencing        | AT4G01290 |
| AT4G01290.+138  | GCAGTTGCAATTGTTTTGAGGAAACC | Sequencing        | AT4G01290 |
| AT4G01290.+647  | GTGGACTAGTATTCTGAATAGTTACC | Sequencing        | AT4G01290 |
| AT4G01290.+1174 | TCTTGAATACTGCTCCATCACG     | Sequencing        | AT4G01290 |
| AT4G01290.+1671 | ATCACGCTCCAACAATTCCTGG     | Sequencing        | AT4G01290 |
| AT4G01290.+2114 | GAGTAAGAGAATTTGGGAATAGAGG  | Sequencing        | AT4G01290 |
| AT4G01290.+2657 | AGCTTTCCTCGATCTCGACTCC     | Sequencing        | AT4G01290 |
| AT4G01290.+3132 | ACGACTTGTTTGGGAAATGATAGGG  | Sequencing        | AT4G01290 |

|                             |                                                           |                                  |           |
|-----------------------------|-----------------------------------------------------------|----------------------------------|-----------|
| AT4G01290.+3653             | TCGGTGACAGCTATCATCCACC                                    | Sequencing                       | AT4G01290 |
| AT4G01290.+4154             | ACCCATCAAATACATGTCTTTTCC                                  | Sequencing                       | AT4G01290 |
| AT4G01290.+4643             | ATGTAAACAACCAGATGCCGGG                                    | Sequencing                       | AT4G01290 |
| AT4G01290.ATG.attB1         | GGGGACAAGTTTGTACAAAAAAGCAGGCTGT<br>ATGATGAGTATAGCAAATGAAC | Cloning Gateway                  | AT4G01290 |
| AT4G01290.stop.attB2        | GGGGACCACTTTGTACAAGAAAGCTGGGTGT<br>TACCTGTAGCCAAACCCAAGG  | Cloning Gateway                  | AT4G01290 |
| AT4G01290.nostop.attB2      | GGGGACCACTTTGTACAAGAAAGCTGGGTGT<br>GACCTGTAGCCAAACCCAAGG  | Cloning Gateway                  | AT4G01290 |
| cbe1-1mut.F                 | ATGTACATTTGTAGGCGCCAC                                     | Genotyping<br>WiscDsLoxHs188_10F | AT4G01290 |
| cbe1-1mut.R                 | CTTAATTCCAACGGTTTTCC                                      | Genotyping<br>WiscDsLoxHs188_10F | AT4G01290 |
| L4.WiscDsLoxHs.LB           | TGATCCATGTAGATTTCCCGGACATGAAG                             | Genotyping                       |           |
| SALK_038452_F               | GAAATACGAAGCCCTCAGACC                                     | Genotyping<br>SALK_038452        | AT4G01290 |
| SALK_038452_R               | GTATTGTTGGGGATGTTGGTG                                     | Genotyping<br>SALK_038452        | AT4G01290 |
| SALK_LBb1.3                 | ATTTTGCCGATTTTCGGAAC                                      | Genotyping                       |           |
| GK-150H09_F                 | AGTATTCCATCCGTTTCGATTCAC                                  | Genotyping GK-150H09             | AT4G01290 |
| GK-150H09_R                 | AGAAACGAGAGTCCATAGAGAC                                    | Genotyping GK-150H09             | AT4G01290 |
| GK_LB_o8474                 | ATAATAACGCTGCGGACATCTACATTTT                              | Genotyping                       |           |
| Ubox.qF                     | TGCGCTGCCAGATAATACTACTATT                                 | RT-qPCR                          | AT5G15400 |
| Ubox.qR                     | TGCTGCCCAACATCAGGTT                                       | RT-qPCR                          | AT5G15400 |
| At4g01290_qPCR_F_upstream   | AGCACTGTTGCTTGACTTCG                                      | RT-qPCR                          | AT4G01290 |
| At4g01290_qPCR_R_upstream   | GGCGATGAACTATAGTCATTCCG                                   | RT-qPCR                          | AT4G01290 |
| At4g01290_qPCR_F_downstream | TTGGGGATTCAGCAGAGGATGG                                    | RT-qPCR                          | AT4G01290 |
| At4g01290_qPCR_R_downstream | ACCCAAGGTCGAGTTCATGACC                                    | RT-qPCR                          | AT4G01290 |
| RBOHD.qF                    | ATGATCAAGGTGGCTGTTTACCC                                   | RT-qPCR                          | AT5G47910 |
| RBOHD.qR                    | GCAGTTCACCAACATGAACTGTCC                                  | RT-qPCR                          | AT5G47910 |
| cum1-1.F                    | AAGCCTAATTCAATAGAGAATCCGA                                 | Genotyping                       | AT4G18040 |
| cum1-1.R                    | GTCGGAAATAAAATAAAATCAAAAACCTAAGCT                         | Genotyping                       | AT4G18040 |
| eIFiso4E-1.F                | TTGACCCAATAGAGTCCAGAAAT                                   | Genotyping                       | AT5G35620 |
| eIFiso4E-1.R                | CTCTCCAATCAAAGCCATCAACTA                                  | Genotyping                       | AT5G35620 |
| eIFiso4E-1.insert           | GGTGCAGCAAACCCACACTTTTACT                                 | Genotyping                       | AT5G35620 |
| eIF4Gmut.F                  | AGGTTTCATGTTGATCAATGCC                                    | Genotyping                       | AT3G60240 |
| eIF4Gmut.R                  | GAACGCACCAGAGTGCTTATC                                     | Genotyping                       | AT3G60240 |
| eIF(iso)4G-1.F              | TGATTGGTGAGCTTTTGAAGC                                     | Genotyping                       | AT5G57870 |
| eIF(iso)4G-1.R              | CCAAGCTCCTCTACACACTGC                                     | Genotyping                       | AT5G57870 |
| eIF(iso)4G-2.F              | AATGCAACAACAAGGTGAACC                                     | Genotyping                       | AT2G24050 |
| eIF(iso)4G-2.R              | AAGAAGCTCGTACTTCTCCGG                                     | Genotyping                       | AT2G24050 |
| pat1-1.F                    | GGTTCCTTTCTCTTCAATCCG                                     | Genotyping                       | AT1G79090 |
| pat1-1.R                    | CGGAAGCTCTGTCGAGTATTG                                     | Genotyping                       | AT1G79090 |

|           |                       |            |           |
|-----------|-----------------------|------------|-----------|
| summ2-8.F | TACGCCATTCTTGTACCATCC | Genotyping | AT1G12280 |
| summ2-8.R | CCACTAATGACGCTGAGCTTC | Genotyping | AT1G12280 |

577

578

579

580

581

582 **Table S2. CBE1 transgenics investigated**

| Genetic background | Construct                | Backbone      | Outcome                        |
|--------------------|--------------------------|---------------|--------------------------------|
| Col-0              | <i>p35S-eGFP-cCBE1</i>   | pK7WGF2.0     | No expression of the transgene |
| Col-0              | <i>p35S-cCBE1-eGFP</i>   | pK7FWG2.0     | No expression of the transgene |
| Col-0              | <i>pCBE1-gCBE1-eGFP</i>  | pGWB604       | No expression of the transgene |
| Col-0              | <i>pUBI10-cCBE1-eGFP</i> | pUBC-GFP-Dest | No expression of the transgene |
| <i>bak1-5 mob7</i> | <i>p35S-eGFP-cCBE1</i>   | pK7WGF2.0     | No expression of the transgene |
| <i>bak1-5 mob7</i> | <i>p35S-cCBE1-eGFP</i>   | pK7FWG2.0     | No expression of the transgene |
| <i>bak1-5 mob7</i> | <i>pCBE1-gCBE1-eGFP</i>  | pGWB604       | No expression of the transgene |
| <i>bak1-5 mob7</i> | <i>pUBI10-cCBE1-eGFP</i> | pUBC-GFP-Dest | No expression of the transgene |
| <i>cbe1-1</i>      | <i>p35S-eGFP-cCBE1</i>   | pK7WGF2.0     | No expression of the transgene |
| <i>cbe1-1</i>      | <i>p35S-cCBE1-eGFP</i>   | pK7FWG2.0     | No expression of the transgene |
| <i>cbe1-1</i>      | <i>pCBE1-gCBE1-eGFP</i>  | pGWB604       | No expression of the transgene |
| <i>cbe1-1</i>      | <i>pUBI10-cCBE1-eGFP</i> | pUBC-GFP-Dest | No expression of the transgene |

583

584 **References**

- 585 1. Gust, A.A., Pruitt, R., and Nürnberger, T. (2017). Sensing Danger: Key to Activating  
586 Plant Immunity. *Trends Plant Sci.* 22, 779–791.
- 587 2. Boller, T., and Felix, G. (2009). A renaissance of elicitors: Perception of microbe-  
588 associated molecular patterns and danger signals by pattern-recognition receptors. *Annu.*  
589 *Rev. Plant Biol.* 60, 379–407.
- 590 3. Boutrot, F., and Zipfel, C. (2017). Function, Discovery, and Exploitation of Plant Pattern  
591 Recognition Receptors for Broad-Spectrum Disease Resistance. *Annu. Rev. Phytopathol.*  
592 55, 257–286.
- 593 4. Gómez-Gómez, L., and Boller, T. (2000). FLS2: an LRR receptor-like kinase involved in

- 594 the perception of the bacterial elicitor flagellin in *Arabidopsis*. *Mol. Cell* 5, 1003–11.
- 595 5. Zipfel, C., Kunze, G., Chinchilla, D., Caniard, A., Jones, J.D.G., Boller, T., and Felix, G.  
596 (2006). Perception of the bacterial PAMP EF-Tu by the receptor EFR restricts  
597 *Agrobacterium*-mediated transformation. *Cell* 125, 749–60.
- 598 6. Yamaguchi, Y., Pearce, G., and Ryan, C.A. (2006). The cell surface leucine-rich repeat  
599 receptor for AtPep1, an endogenous peptide elicitor in *Arabidopsis*, is functional in  
600 transgenic tobacco cells. *Proc. Natl. Acad. Sci. U. S. A.* 103, 10104–9.
- 601 7. Chinchilla, D., Zipfel, C., Robatzek, S., Kemmerling, B., Nürnberger, T., Jones, J.D.G.,  
602 Felix, G., and Boller, T. (2007). A flagellin-induced complex of the receptor FLS2 and  
603 BAK1 initiates plant defence. *Nature* 448, 497–500.
- 604 8. Heese, A., Hann, D.R., Gimenez-Ibanez, S., Jones, A.M.E., He, K., Li, J., Schroeder, J.I.,  
605 Peck, S.C., and Rathjen, J.P. (2007). The receptor-like kinase SERK3/BAK1 is a central  
606 regulator of innate immunity in plants. *Proc. Natl. Acad. Sci. U. S. A.* 104, 12217–22.
- 607 9. Roux, M., Schwessinger, B., Albrecht, C., Chinchilla, D., Jones, A., Holton, N.,  
608 Malinovsky, F.G., Tör, M., de Vries, S., and Zipfel, C. (2011). The *Arabidopsis* leucine-  
609 rich repeat receptor-like kinases BAK1/SERK3 and BKK1/SERK4 are required for innate  
610 immunity to hemibiotrophic and biotrophic pathogens. *Plant Cell* 23, 2440–55.
- 611 10. Yu, X., Feng, B., He, P., and Shan, L. (2017). From Chaos to Harmony: Responses and  
612 Signaling upon Microbial Pattern Recognition. *Annu. Rev. Phytopathol.* 55, 109–137.
- 613 11. DeFalco, T.A., and Zipfel, C. (2021). Molecular mechanisms of early plant pattern-  
614 triggered immune signaling. *Mol. Cell* 81, 3449–3467.
- 615 12. Monaghan, J., Matschi, S., Shorinola, O., Rovenich, H., Matei, A., Segonzac, C.,  
616 Malinovsky, F.G., Rathjen, J.P., MacLean, D., Romeis, T., et al. (2014). The calcium-  
617 dependent protein kinase CPK28 buffers plant immunity and regulates BIK1 turnover.  
618 *Cell Host Microbe* 16, 605–15.
- 619 13. Holmes, D.R., Bredow, M., Thor, K., Pascetta, S.A., Sementchoukova, I., Siegel, K.R.,  
620 Zipfel, C., and Monaghan, J. (2021). A novel allele of the *Arabidopsis thaliana* MACPF  
621 protein CAD1 results in deregulated immune signaling. *Genetics* 217.
- 622 14. Stegmann, M., Monaghan, J., Smakowska-Luzan, E., Rovenich, H., Lehner, A., Holton,  
623 N., Belkhadir, Y., and Zipfel, C. (2017). The receptor kinase FER is a RALF-regulated  
624 scaffold controlling plant immune signaling. *Science* 355, 287–289.



- 625 15. Monaghan, J., Matschi, S., Romeis, T., and Zipfel, C. (2015). The calcium-dependent  
626 protein kinase CPK28 negatively regulates the BIK1-mediated PAMP-induced calcium  
627 burst. *Plant Signal. Behav.* *10*, e1018497.
- 628 16. Wang, J., Grubb, L.E., Wang, J., Liang, X., Li, L., Gao, C., Ma, M., Feng, F., Li, M., Li,  
629 L., et al. (2018). A Regulatory Module Controlling Homeostasis of a Plant Immune  
630 Kinase. *Mol. Cell* *69*, 493-504.e6.
- 631 17. Morita-Yamamuro, C., Tsutsui, T., Sato, M., Yoshioka, H., Tamaoki, M., Ogawa, D.,  
632 Matsuura, H., Yoshihara, T., Ikeda, A., Uyeda, I., et al. (2005). The Arabidopsis gene  
633 CAD1 controls programmed cell death in the plant immune system and encodes a protein  
634 containing a MACPF domain. *Plant Cell Physiol.* *46*, 902–12.
- 635 18. Chen, T., Nomura, K., Wang, X., Sohrabi, R., Xu, J., Yao, L., Paasch, B.C., Ma, L.,  
636 Kremer, J., Cheng, Y., et al. (2020). A plant genetic network for preventing dysbiosis in  
637 the phyllosphere. *Nature* *580*, 653–657.
- 638 19. Xiao, Y., Stegmann, M., Han, Z., DeFalco, T.A., Parys, K., Xu, L., Belkhadir, Y., Zipfel,  
639 C., and Chai, J. (2019). Mechanisms of RALF peptide perception by a heterotypic  
640 receptor complex. *Nature* *572*, 270–274.
- 641 20. Gronnier, J., Franck, C.M., Stegmann, M., DeFalco, T.A., Abarca, A., Von Arx, M.,  
642 Dünser, K., Lin, W., Yang, Z., Kleine-Vehn, J., et al. (2022). Regulation of immune  
643 receptor kinase plasma membrane nanoscale organization by a plant peptide hormone and  
644 its receptors. *Elife* *11*, 2020.07.20.212233.
- 645 21. Bush, M.S., Hutchins, A.P., Jones, A.M.E., Naldrett, M.J., Jarmolowski, A., Lloyd, C.W.,  
646 and Doonan, J.H. (2009). Selective recruitment of proteins to 5' cap complexes during the  
647 growth cycle in Arabidopsis. *Plant J.* *59*, 400–412.
- 648 22. Patrick, R.M., Lee, J.C.H., Teetsel, J.R.J., Yang, S., Choy, G.S., and Browning, K.S.  
649 (2018). Discovery and characterization of conserved binding of eIF4E 1 (CBE1), a  
650 eukaryotic translation initiation factor 4E-binding plant protein. *J. Biol. Chem.* *293*,  
651 17240–17247.
- 652 23. Schwessinger, B., Roux, M., Kadota, Y., Ntoukakis, V., Sklenar, J., Jones, A., and Zipfel,  
653 C. (2011). Phosphorylation-dependent differential regulation of plant growth, cell death,  
654 and innate immunity by the regulatory receptor-like kinase BAK1. *PLoS Genet.* *7*,  
655 e1002046.



- 656 24. Brogna, S., and Wen, J. (2009). Nonsense-mediated mRNA decay (NMD) mechanisms.  
657 Nat. Struct. Mol. Biol. *16*, 107–13.
- 658 25. Adler, J., and Parmryd, I. (2010). Quantifying colocalization by correlation: the Pearson  
659 correlation coefficient is superior to the Mander's overlap coefficient. *Cytometry. A* *77*,  
660 733–42.
- 661 26. Chantarachot, T., and Bailey-Serres, J. (2018). Polysomes, Stress Granules, and  
662 Processing Bodies: A Dynamic Triumvirate Controlling Cytoplasmic mRNA Fate and  
663 Function. *Plant Physiol.* *176*, 254–269.
- 664 27. Xu, J., Yang, J.-Y., Niu, Q.-W., and Chua, N.-H. (2006). Arabidopsis DCP2, DCP1, and  
665 VARICOSE Form a Decapping Complex Required for Postembryonic Development.  
666 *Plant Cell* *18*, 3386–3398.
- 667 28. Kerényi, F., Wawer, I., Sikorski, P.J., Kufel, J., and Silhavy, D. (2013). Phosphorylation  
668 of the N- and C-terminal UPF1 domains plays a critical role in plant nonsense-mediated  
669 mRNA decay. *Plant J.* *76*, 836–48.
- 670 29. Weber, C., Nover, L., and Fauth, M. (2008). Plant stress granules and mRNA processing  
671 bodies are distinct from heat stress granules. *Plant J.* *56*, 517–530.
- 672 30. Sorenson, R., and Bailey-Serres, J. (2014). Selective mRNA sequestration by  
673 OLIGOURIDYLATE-BINDING PROTEIN 1 contributes to translational control during  
674 hypoxia in Arabidopsis. *Proc. Natl. Acad. Sci.* *111*, 2373–2378.
- 675 31. Browning, K.S., and Bailey-Serres, J. (2015). Mechanism of Cytoplasmic mRNA  
676 Translation. *Arab. B.* *13*, e0176.
- 677 32. Roux, M.E., Rasmussen, M.W., Palma, K., Lolle, S., Regué, À.M., Bethke, G.,  
678 Glazebrook, J., Zhang, W., Sieburth, L., Larsen, M.R., et al. (2015). The mRNA decay  
679 factor PAT1 functions in a pathway including MAP kinase 4 and immune receptor  
680 SUMM2. *EMBO J.* *34*, 593–608.
- 681 33. Kong, L., Rodrigues, B., Kim, J.H., He, P., and Shan, L. (2021). More than an on-and-off  
682 switch: Post-translational modifications of plant pattern recognition receptor complexes.  
683 *Curr. Opin. Plant Biol.* *63*, 102051.
- 684 34. Meteignier, L.-V., El Oirdi, M., Cohen, M., Barff, T., Matteau, D., Lucier, J.-F., Rodrigue,  
685 S., Jacques, P.-E., Yoshioka, K., and Moffett, P. (2017). Translatome analysis of an NB-  
686 LRR immune response identifies important contributors to plant immunity in Arabidopsis.

- 687 J. Exp. Bot. 68, 2333–2344.
- 688 35. Xu, G., Greene, G.H., Yoo, H., Liu, L., Marqués, J., Motley, J., and Dong, X. (2017).  
689 Global translational reprogramming is a fundamental layer of immune regulation in plants.  
690 Nature 545, 487–490.
- 691 36. Yoo, H., Greene, G.H., Yuan, M., Xu, G., Burton, D., Liu, L., Marqués, J., and Dong, X.  
692 (2020). Translational Regulation of Metabolic Dynamics during Effector-Triggered  
693 Immunity. Mol. Plant 13, 88–98.
- 694 37. Bach-pages, M., Chen, H., Sanguankiattichai, N., Soldan, R., Kaiser, M., Mohammed, S.,  
695 Hoorn, R.A.L. Van Der, Castello, A., Preston, G.M., Kaschani, F., et al. (2020).  
696 Proteome-wide profiling of RNA-binding protein responses to flg22 reveals novel  
697 components of plant immunity. bioRxiv.
- 698 38. Dinesh-Kumar, S.P., and Baker, B.J. (2000). Alternatively spliced N resistance gene  
699 transcripts: their possible role in tobacco mosaic virus resistance. Proc. Natl. Acad. Sci. U.  
700 S. A. 97, 1908–13.
- 701 39. Zhang, X.-C., and Gassmann, W. (2007). Alternative splicing and mRNA levels of the  
702 disease resistance gene RPS4 are induced during defense responses. Plant Physiol. 145,  
703 1577–87.
- 704 40. Gassmann, W. (2008). Alternative splicing in plant defense. Curr. Top. Microbiol.  
705 Immunol. 326, 219–33.
- 706 41. Yang, S., Tang, F., and Zhu, H. (2014). Alternative splicing in plant immunity. Int. J. Mol.  
707 Sci. 15, 10424–45.
- 708 42. Zhang, Z., Liu, Y., Ding, P., Li, Y., Kong, Q., and Zhang, Y. (2014). Splicing of receptor-  
709 like kinase-encoding SNC4 and CERK1 is regulated by two conserved splicing factors  
710 that are required for plant immunity. Mol. Plant 7, 1766–75.
- 711 43. Liu, J., Chen, X., Liang, X., Zhou, X., Yang, F., Liu, J., He, S.Y., and Guo, Z. (2016).  
712 Alternative Splicing of Rice WRKY62 and WRKY76 Transcription Factor Genes in  
713 Pathogen Defense. Plant Physiol. 171, 1427–42.
- 714 44. Bazin, J., Mariappan, K., Jiang, Y., Blein, T., Voelz, R., Crespi, M., and Hirt, H. (2020).  
715 Role of MPK4 in pathogen-associated molecular pattern-triggered alternative splicing in  
716 Arabidopsis. PLoS Pathog. 16, e1008401.
- 717 45. Dressano, K., Weckwerth, P.R., Poretsky, E., Takahashi, Y., Villarreal, C., Shen, Z.,

- 718 Schroeder, J.I., Briggs, S.P., and Huffaker, A. (2020). Dynamic regulation of Pep-induced  
719 immunity through post-translational control of defence transcript splicing. *Nat. Plants*.
- 720 46. Liang, W., Li, C., Liu, F., Jiang, H., Li, S., Sun, J., Wu, X., and Li, C. (2009). The  
721 Arabidopsis homologs of CCR4-associated factor 1 show mRNA deadenylation activity  
722 and play a role in plant defence responses. *Cell Res.* *19*, 307–16.
- 723 47. Walley, J.W., Kelley, D.R., Savchenko, T., and Dehesh, K. (2010). Investigating the  
724 function of CAF1 deadenylases during plant stress responses. *Plant Signal. Behav.* *5*, 802–  
725 5.
- 726 48. Gloggnitzer, J., Akimcheva, S., Srinivasan, A., Kusenda, B., Riehs, N., Stampfl, H.,  
727 Bautor, J., Dekrout, B., Jonak, C., Jiménez-Gómez, J.M., et al. (2014). Nonsense-mediated  
728 mRNA decay modulates immune receptor levels to regulate plant antibacterial defense.  
729 *Cell Host Microbe* *16*, 376–90.
- 730 49. Tabassum, N., Eschen-Lippold, L., Athmer, B., Baruah, M., Brode, M., Maldonado-  
731 Bonilla, L.D., Hoehenwarter, W., Hause, G., Scheel, D., and Lee, J. (2020).  
732 Phosphorylation-dependent control of an RNA granule-localized protein that fine-tunes  
733 defence gene expression at a post-transcriptional level. *Plant J.* *101*, 1023–1039.
- 734 50. Yu, X., Li, B., Jang, G.-J., Jiang, S., Jiang, D., Jang, J.-C., Wu, S.-H., Shan, L., and He, P.  
735 (2019). Orchestration of Processing Body Dynamics and mRNA Decay in Arabidopsis  
736 Immunity. *Cell Rep.* *28*, 2194-2205.e6.
- 737 51. Chantarachot, T., Sorenson, R.S., Hummel, M., Ke, H., Kettenburg, A.T., Chen, D.,  
738 Aiyetiwa, K., Dehesh, K., Eulgem, T., Sieburth, L.E., et al. (2020). DHH1/DDX6-like  
739 RNA helicases maintain ephemeral half-lives of stress-response mRNAs. *Nat. Plants* *6*,  
740 675–685.
- 741 52. Castro, B., Citterico, M., Kimura, S., Stevens, D.M., Wrzaczek, M., and Coaker, G.  
742 (2021). Stress-induced reactive oxygen species compartmentalization, perception and  
743 signalling. *Nat. plants* *7*, 403–412.
- 744 53. Chen, D., Cao, Y., Li, H., Kim, D., Ahsan, N., Thelen, J., and Stacey, G. (2017).  
745 Extracellular ATP elicits DORN1-mediated RBOHD phosphorylation to regulate stomatal  
746 aperture. *Nat. Commun.* *8*, 2265.
- 747 54. Kadota, Y., Sklenar, J., Derbyshire, P., Stransfeld, L., Asai, S., Ntoukakis, V., Jones, J.D.,  
748 Shirasu, K., Menke, F., Jones, A., et al. (2014). Direct regulation of the NADPH oxidase

- 749 RBOHD by the PRR-associated kinase BIK1 during plant immunity. *Mol. Cell* *54*, 43–55.
- 750 55. Li, L., Li, M., Yu, L., Zhou, Z., Liang, X., Liu, Z., Cai, G., Gao, L., Zhang, X., Wang, Y.,  
751 et al. (2014). The FLS2-associated kinase BIK1 directly phosphorylates the NADPH  
752 oxidase RbohD to control plant immunity. *Cell Host Microbe* *15*, 329–38.
- 753 56. Zhang, M., Chiang, Y.-H., Toruño, T.Y., Lee, D., Ma, M., Liang, X., Lal, N.K., Lemos,  
754 M., Lu, Y.-J., Ma, S., et al. (2018). The MAP4 Kinase SIK1 Ensures Robust Extracellular  
755 ROS Burst and Antibacterial Immunity in Plants. *Cell Host Microbe* *24*, 379-391.e5.
- 756 57. Lee, D., Lal, N.K., Lin, Z.D., Ma, S., Liu, J., Castro, B., Toruño, T., Dinesh-Kumar, S.P.,  
757 and Coaker, G. (2020). Regulation of reactive oxygen species during plant immunity  
758 through phosphorylation and ubiquitination of RBOHD. *Nat. Commun.* *11*, 1838.
- 759 58. Ngou, B.P.M., Ahn, H.K., Ding, P., and Jones, J.D.G. (2021). Mutual potentiation of plant  
760 immunity by cell-surface and intracellular receptors. *Nature* *592*, 110–115.
- 761 59. Khan, M.A., and Goss, D.J. (2018). Kinetic analyses of phosphorylated and non-  
762 phosphorylated eIFiso4E binding to mRNA cap analogues. *Int. J. Biol. Macromol.* *106*,  
763 387–395.
- 764 60. Kropiwnicka, A., Kuchta, K., Lukaszewicz, M., Kowalska, J., Jemielity, J., Ginalski, K.,  
765 Darzynkiewicz, E., and Zuberek, J. (2015). Five eIF4E isoforms from *Arabidopsis*  
766 *thaliana* are characterized by distinct features of cap analogs binding. *Biochem. Biophys.*  
767 *Res. Commun.* *456*, 47–52.
- 768 61. Luo, Y., Na, Z., and Slavoff, S.A. (2018). P-Bodies: Composition, Properties, and  
769 Functions. *Biochemistry* *57*, 2424–2431.
- 770 62. Torres, M.A., Dangl, J.L., and Jones, J.D.G. (2002). *Arabidopsis* gp91phox homologues  
771 *AtrbohD* and *AtrbohF* are required for accumulation of reactive oxygen intermediates in  
772 the plant defense response. *Proc. Natl. Acad. Sci. U. S. A.* *99*, 517–22.
- 773 63. Yoshii, M., Yoshioka, N., Ishikawa, M., and Naito, S. (1998). Isolation of an *Arabidopsis*  
774 *thaliana* mutant in which accumulation of cucumber mosaic virus coat protein is delayed.  
775 *Plant J.* *13*, 211–219.
- 776 64. Duprat, A., Caranta, C., Revers, F., Menand, B., Browning, K.S., and Robaglia, C. (2002).  
777 The *Arabidopsis* eukaryotic initiation factor (iso)4E is dispensable for plant growth but  
778 required for susceptibility to potyviruses. *Plant J.* *32*, 927–34.
- 779 65. Nicaise, V., Gallois, J.-L., Chafiai, F., Allen, L.M., Schurdi-Levraud, V., Browning, K.S.,

- 780 Candresse, T., Caranta, C., Le Gall, O., and German-Retana, S. (2007). Coordinated and  
781 selective recruitment of eIF4E and eIF4G factors for potyvirus infection in *Arabidopsis*  
782 *thaliana*. *FEBS Lett.* *581*, 1041–6.
- 783 66. Hou, X., Li, L., Peng, Z., Wei, B., Tang, S., Ding, M., Liu, J., Zhang, F., Zhao, Y., Gu, H.,  
784 et al. (2010). A platform of high-density INDEL/CAPS markers for map-based cloning in  
785 *Arabidopsis*. *Plant J.* *63*, 880–8.
- 786 67. Li, H., and Durbin, R. (2009). Fast and accurate short read alignment with Burrows-  
787 Wheeler transform. *Bioinformatics* *25*, 1754–60.
- 788 68. Etherington, G.J., Monaghan, J., Zipfel, C., and MacLean, D. (2014). Mapping mutations  
789 in plant genomes with the user-friendly web application CandiSNP. *Plant Methods* *10*, 41.
- 790 69. Felix, G., Duran, J.D., Volko, S., and Boller, T. (1999). Plants have a sensitive perception  
791 system for the most conserved domain of bacterial flagellin. *Plant J.* *18*, 265–76.
- 792 70. Kunze, G., Zipfel, C., Robatzek, S., Niehaus, K., Boller, T., and Felix, G. (2004). The N  
793 terminus of bacterial elongation factor Tu elicits innate immunity in *Arabidopsis* plants.  
794 *Plant Cell* *16*, 3496–507.
- 795 71. Huffaker, A., Pearce, G., and Ryan, C. a (2006). An endogenous peptide signal in  
796 *Arabidopsis* activates components of the innate immune response. *Proc. Natl. Acad. Sci.*  
797 *U. S. A.* *103*, 10098–103.
- 798 72. Flury, P., Klauser, D., Schulze, B., Boller, T., and Bartels, S. (2013). The anticipation of  
799 danger: microbe-associated molecular pattern perception enhances AtPep-triggered  
800 oxidative burst. *Plant Physiol.* *161*, 2023–35.
- 801 73. Katagiri, F., Thilmony, R., and He, S.Y. (2002). The *Arabidopsis thaliana*-*Pseudomonas*  
802 *syringae* interaction. *Arab. B.* *1*, e0039.
- 803 74. Melotto, M., Underwood, W., Koczan, J., Nomura, K., and He, S.Y. (2006). Plant stomata  
804 function in innate immunity against bacterial invasion. *Cell* *126*, 969–80.
- 805 75. Grefen, C., Donald, N., Hashimoto, K., Kudla, J., Schumacher, K., and Blatt, M.R. (2010).  
806 A ubiquitin-10 promoter-based vector set for fluorescent protein tagging facilitates  
807 temporal stability and native protein distribution in transient and stable expression studies.  
808 *Plant J.* *64*, 355–65.
- 809 76. Karimi, M., Inzé, D., and Depicker, A. (2002). GATEWAY vectors for *Agrobacterium*-  
810 mediated plant transformation. *Trends Plant Sci.* *7*, 193–5.

- 811 77. Nakamura, S., Mano, S., Tanaka, Y., Ohnishi, M., Nakamori, C., Araki, M., Niwa, T.,  
812 Nishimura, M., Kaminaka, H., Nakagawa, T., et al. (2010). Gateway binary vectors with  
813 the bialaphos resistance gene, bar, as a selection marker for plant transformation. *Biosci.*  
814 *Biotechnol. Biochem.* *74*, 1315–9.
- 815 78. Clough, S.J., and Bent, A.F. (1998). Floral dip: a simplified method for *Agrobacterium*-  
816 mediated transformation of *Arabidopsis thaliana*. *Plant J.* *16*, 735–43.
- 817 79. Dunn, K.W., Kamocka, M.M., and McDonald, J.H. (2011). A practical guide to evaluating  
818 colocalization in biological microscopy. *Am. J. Physiol. Cell Physiol.* *300*, C723-42.
- 819

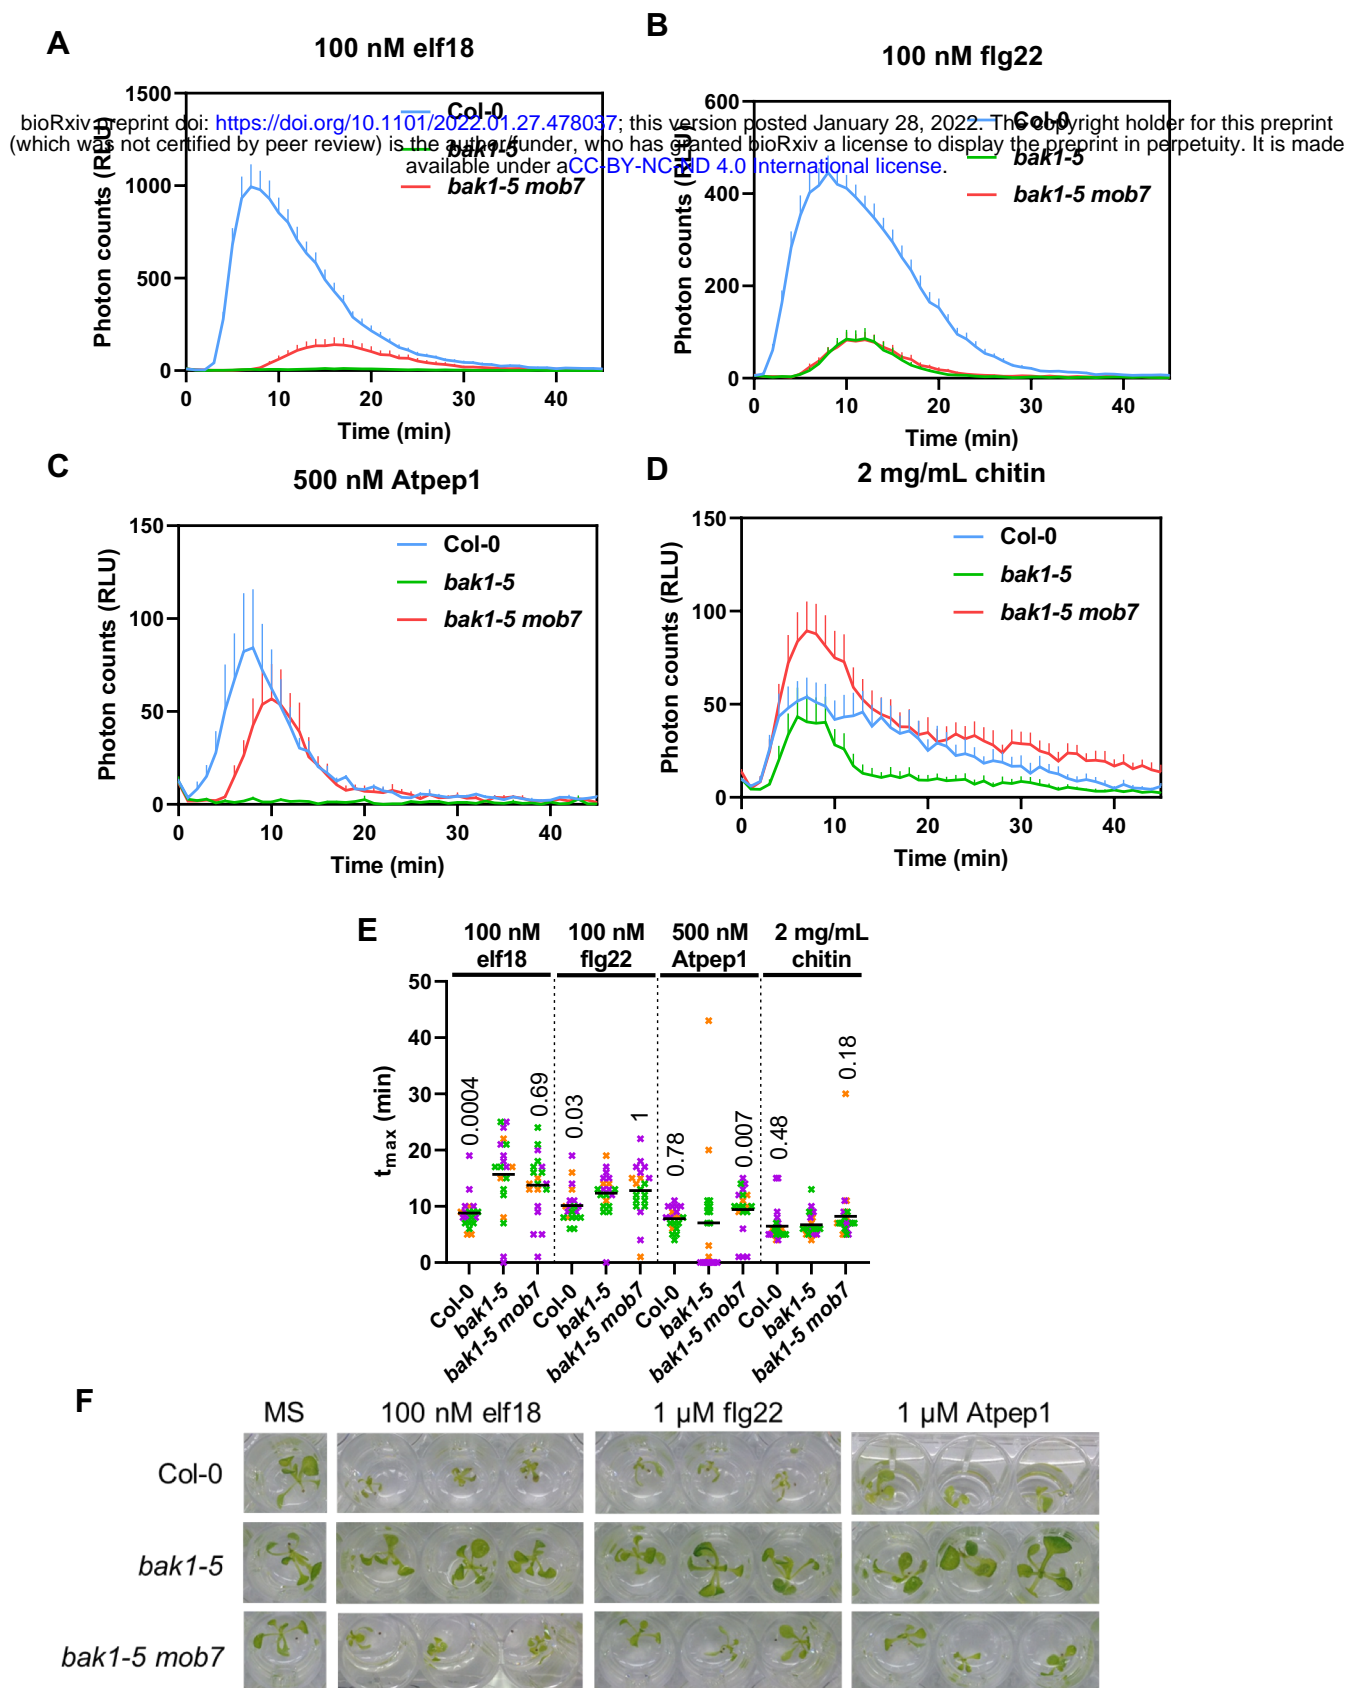

**Figure S1. *mob7* restores immune signalling in *bak1-5*. Related to Figure 1.**

(A-D) ROS burst kinetic measured as relative light units (RLU), in leaf discs following treatment with 100 nM elf18 (A) or 100 nM flg22 (B) or 500 nM Atpep1 (C) or 2 mg/mL chitin (D). Values are means + standard errors (n=8). (E)  $T_{max}$  describes the time it takes for the ROS to peak upon treatment with corresponding elicitors over 60 min recording.. Horizontal lines represent the means from 3 independent experiments (n=4-8). The symbol colors indicate the different experiments. Numbers above symbols are p-values from Dunn's multiple comparison test between corresponding genotype and *bak1-5*. (F) Images of 14-day-old seedlings grown in MS media or MS media containing 100 nM elf18, 1  $\mu$ M flg22 or 1  $\mu$ M Atpep1.



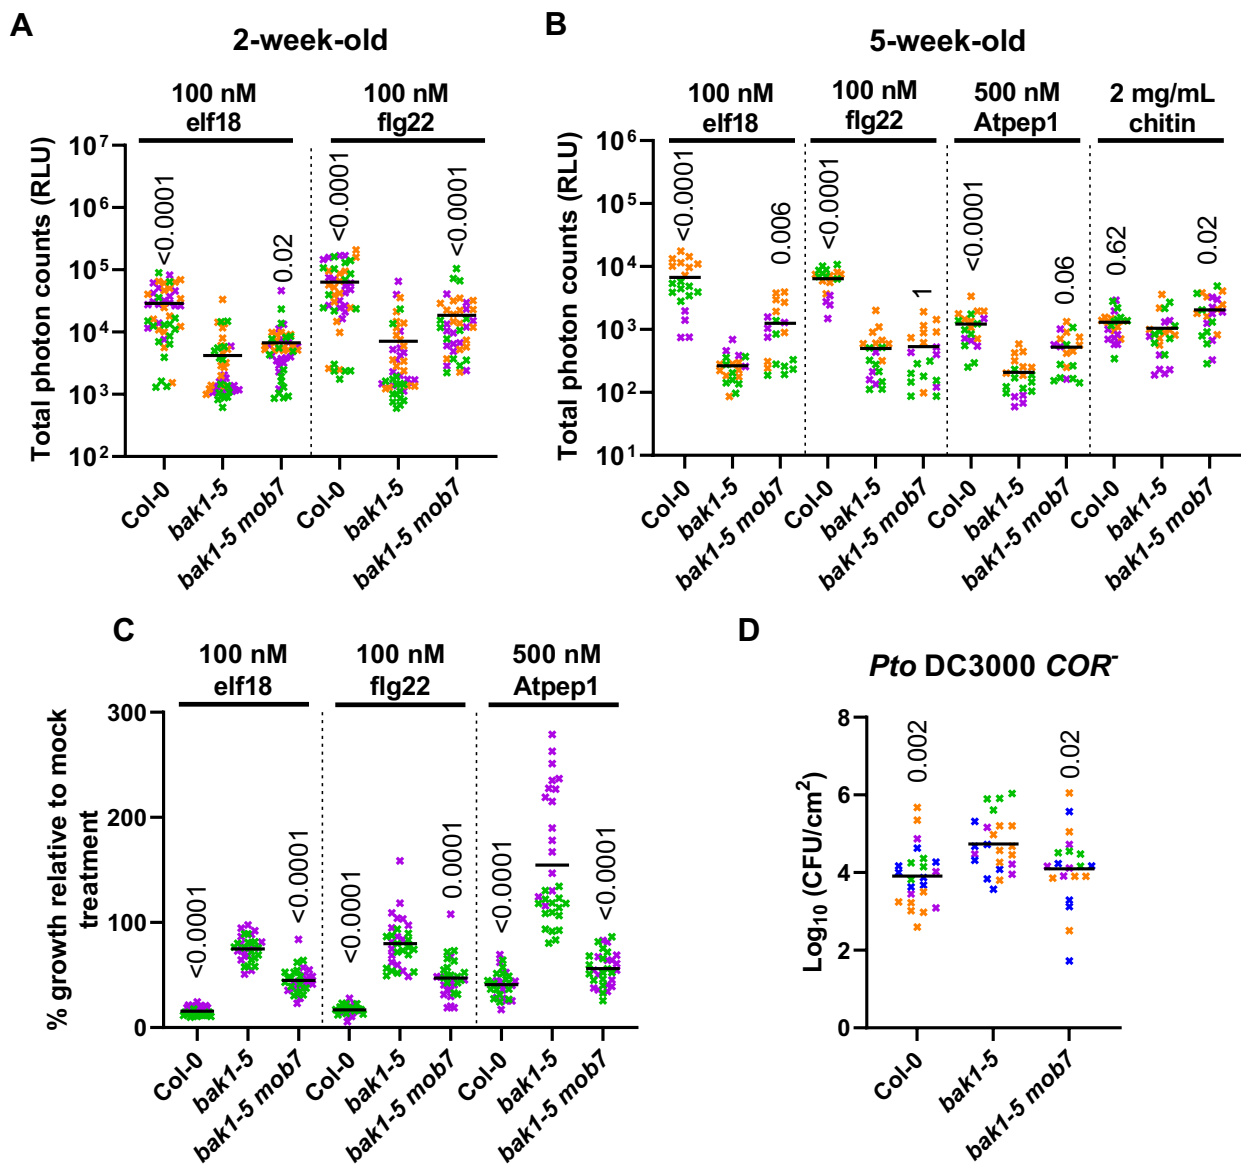

**Figure 1. *mob7* restores immune signalling in *bak1-5*.**

(A-B) Total ROS accumulation measured as relative light units (RLU) over 60 min recording after treatment with the corresponding elicitors on (A) 2-week-old seedlings (n=12-16) or (B) leaf discs from 5-week-old leaves (n=4-8). Horizontal lines represent the means from 3 independent experiments (n=4-8) (C) Growth inhibition is represented as relative fresh weight compared to untreated seedlings in response to the indicated elicitors. Horizontal lines represent the means from 2 independent experiments (n=12-17). (D) Bacterial growth (colony-forming unit - CFU /cm<sup>2</sup>) in leaves spray-inoculated with 10<sup>7</sup> CFU/mL (OD<sub>600</sub> = 0.2) *P. syringae* pv. *tomato* (*Pto*) DC3000 *COR*<sup>-</sup> and sampled at 3 dpi. Horizontal lines represent the means from 4 independent experiments (n=4-8). (A-D) Symbol colors indicate different experiments. Numbers above symbols are p-values from (A, B, C) Dunn's or (D) Dunnett's multiple comparison test between corresponding genotypes and *bak1-5*.

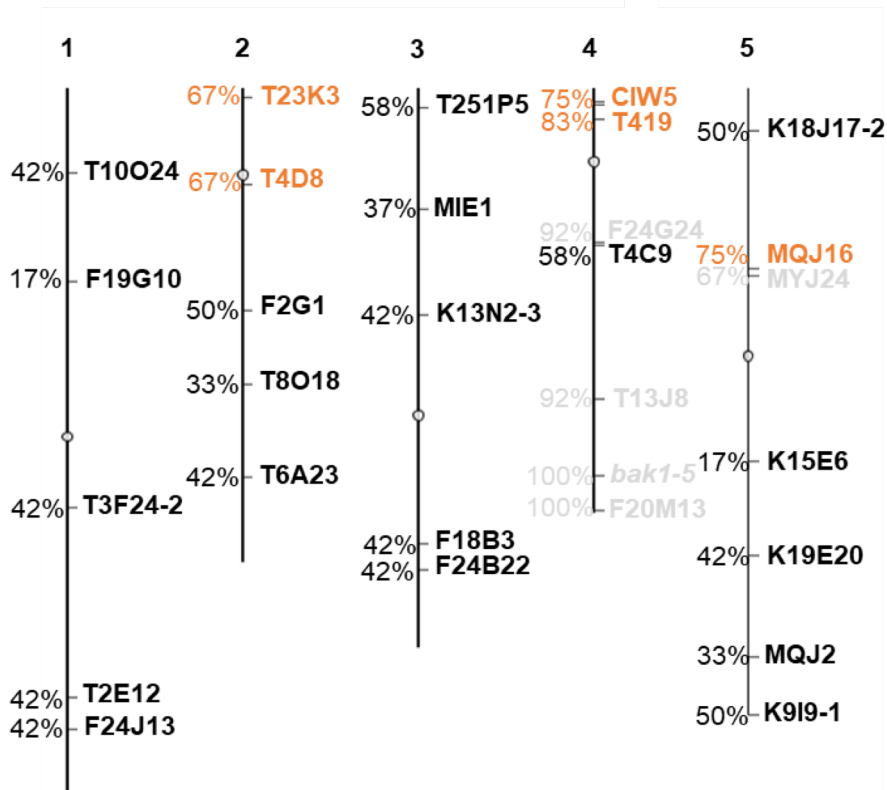

### Figure S2. Map-based cloning of *bak1-5 mob7*.

Physical linkage map constructed using the F<sub>2</sub> population from *bak1-5 mob7* x Ler-0. The percentage represent the percentage of Col-0 alleles contributed by *bak1-5 mob7*. Plants were screened based on ROS production upon treatment with 100 nM elf18. Markers in grey are markers for which an increase of Col-0 alleles was also observed in plants with low elicitor-induced ROS production, thereby removed from further analysis. Markers in orange show linkage statistically higher than 50%. Circles represent centromeres. Significance was determined by  $\chi^2$  test.

A

bioRxiv preprint doi: <https://doi.org/10.1101/2022.01.27.478037>; this version posted January 28, 2022. The copyright holder for this preprint (which was not certified by peer review) is the author/funder, who has granted bioRxiv a license to display the preprint in perpetuity. It is made available under aCC-BY-NC-ND 4.0 International license.

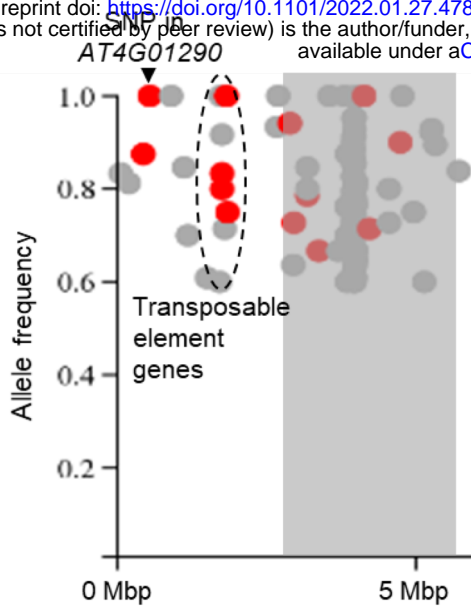

C

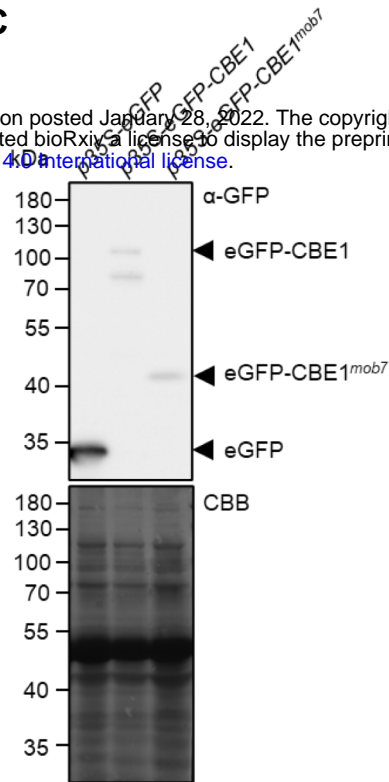

B

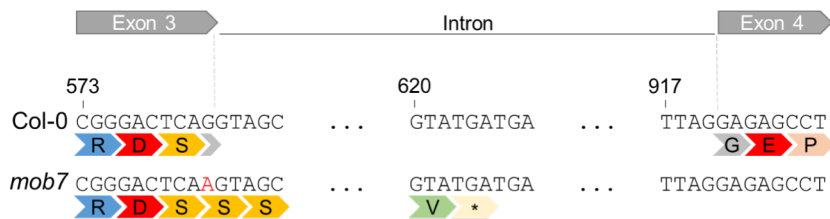

## Figure 2. *mob7* mutation maps to **CONSERVED BINDING OF EIF4E1** resulting in a truncated protein.

(A) Density plot of SNPs at the top arm of chromosome 4 using CandiSNP software (Etherington *et al.*, 2014). SNPs with an allele frequency below 60% were removed from the plots. Non-synonymous SNPs are shown in red and others in grey. Grey rectangles indicate the centromere. The dashed area delimits several non-synonymous SNPs in transposable element genes. Mbp, mega base pairs. (B) The *mob7* mutation leads to a premature stop codon within the intron downstream of exon 3. The top symbols delimit nucleotides from exons 3, 4 and intron within *AT4G01290*. The number indicates the nucleotide position relative to the adenosine of the start codon. The second line shows amino acids corresponding to codons above. The EMS-induced SNP in *mob7* is indicated in red. Star indicates a stop codon. (C) Immunoblot analysis using anti-GFP after transient expression in *N. benthamiana*. Coomassie Brilliant Blue (CBB) stain is shown as loading control. Experiment was repeated once with similar results.

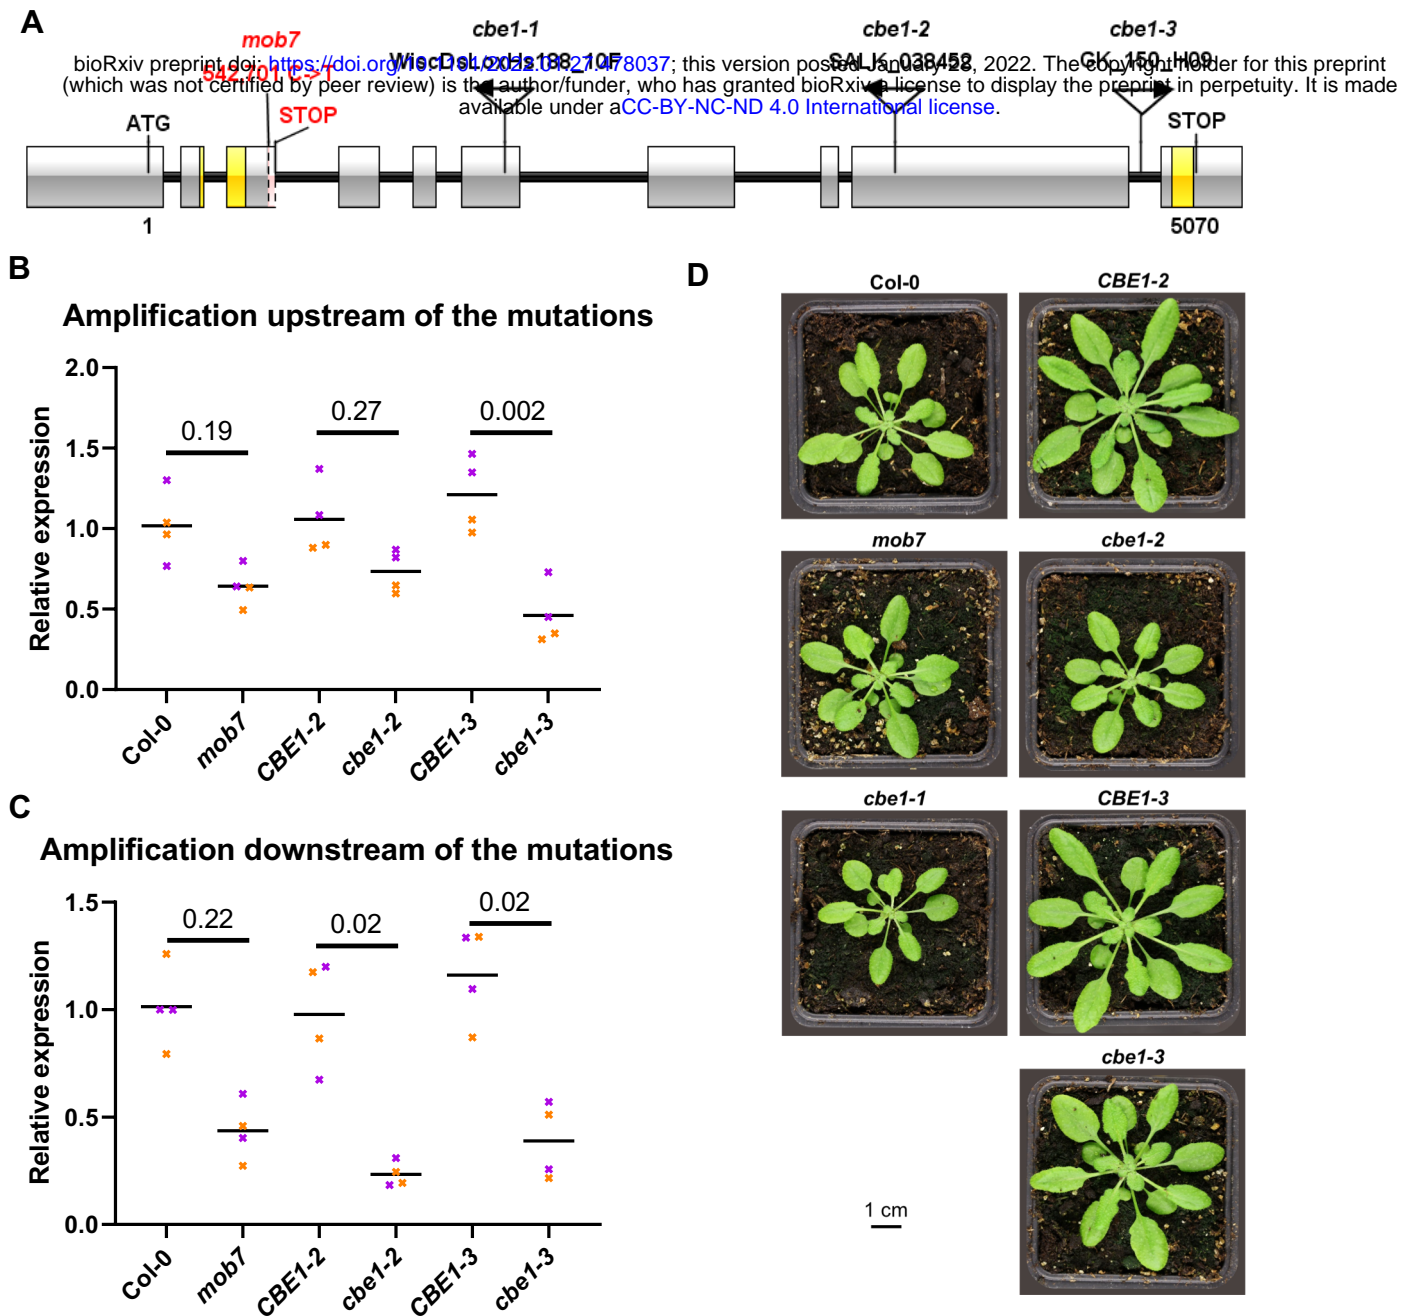

### Figure S3. Characterization of *cbe1* alleles.

(A) Gene structure of *AT4G01290*. Exons are shown as grey boxes. T-DNA insertions are indicated with the respective name above and arrows indicate the orientation of the T-DNAs. EMS-induced *mob7* mutation with respective position and early stop codon are indicated in red. Fragments amplified by quantitative reverse-transcription polymerase chain reaction (RT-qPCR) are indicated in yellow. Bp, base pairs. (B, C) RT-qPCR of *AT4G01290* upstream of the T-DNA insertions/*mob7* mutation (B) or downstream of the insertions/mutation (C). (B,C) Expression values relative to the *U-BOX* housekeeping gene are shown. CBE1-2 and CBE1-3 are *CBE1* wildtype segregants from the *cbe1-2* and *cbe1-3* lines, respectively. Horizontal lines represent the means from 2 independent experiments (n=2) (B,C) The symbol colours indicate the different experiments. Numbers above horizontal lines are p-values from Dunn's multiple comparison test between genotypes under the lines. (D) Rosette morphology of 5-week-old plants of the corresponding genotype.

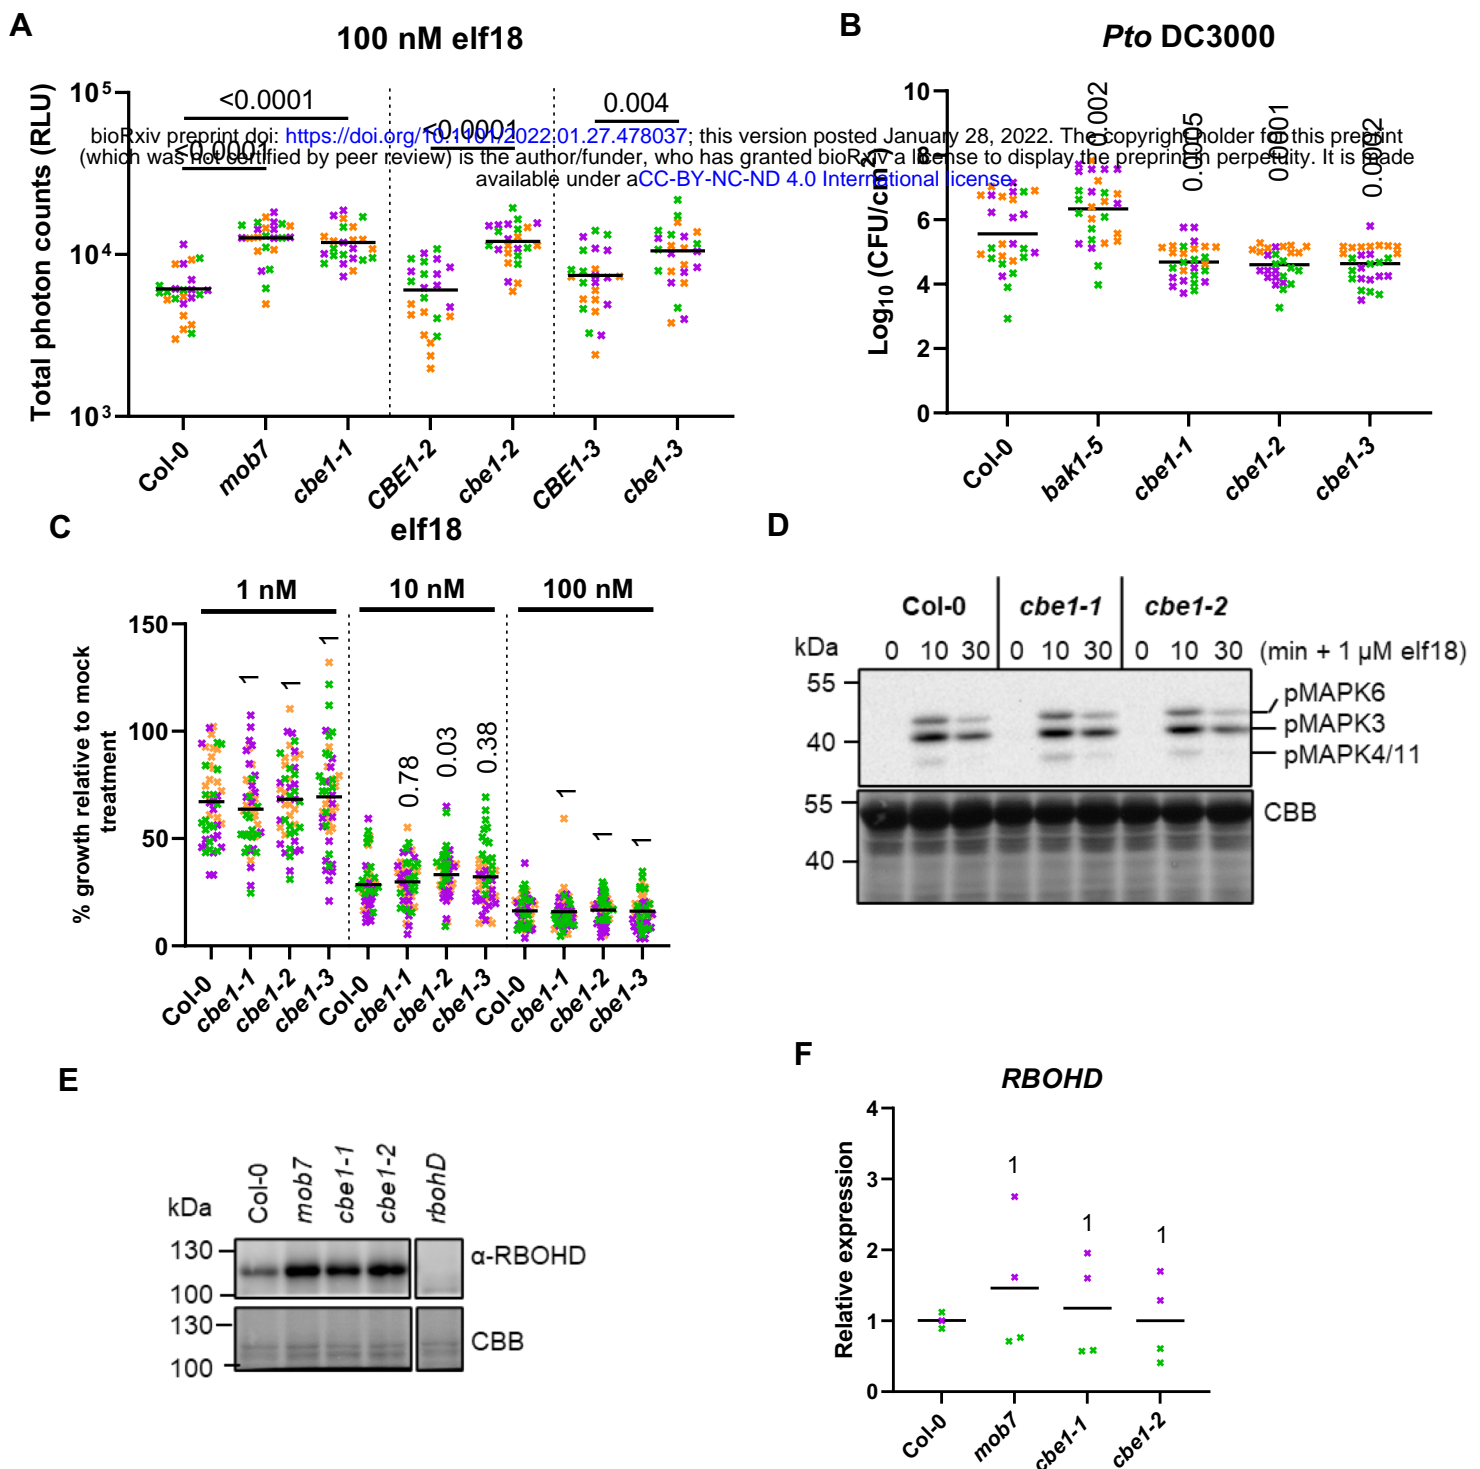

**Figure 3. CBE1 negatively regulates elicitor-induced ROS production and RBOHD protein levels.**

(A) Total ROS accumulation measured as RLU over 60 min recording after treating leaf discs from 5-week-old plants with 100 nM elf18. Horizontal lines represent the means from 3 independent experiments (n=8). (B) Bacterial growth (CFU/cm<sup>2</sup>) in leaves spray inoculated with 10<sup>7</sup> CFU/mL (OD<sub>600</sub> = 0.2) *P. syringae* pv. *tomato* DC3000 and sampled at 3 dpi. Horizontal lines represent the means from 3 independent experiments (n=9). (C) Growth inhibition represented as percentage of fresh weight in response to 1, 10 or 100 nM elf18 relative to mock treated seedlings. Horizontal lines represent the means from 3 independent experiments (n=16). (D) Immunoblot analysis of elf18-induced MAPK phosphorylation using anti-phospho-p44/42 in leaf discs from 5-week-old Arabidopsis leaves treated with 1 μM elf18 for the indicated time. Coomassie Brilliant Blue (CBB) stain is shown as loading control. Experiment was repeated twice with similar results. (E) Immunoblot analysis of RBOHD (anti-RBOHD) and BAK1 (anti-BAK1) protein accumulations in 5-week-old Arabidopsis leaves from corresponding genotypes. Coomassie Brilliant Blue (CBB) stain is shown as loading control. Experiment was repeated twice with similar results. (F) qRT-PCR of *RBOHD* transcripts in corresponding genotypes. Expression values relative to the *U-BOX* housekeeping gene are shown. Horizontal lines represent the means from 2 independent experiments (n=1-2). Numbers above symbols are p-values from (A, B) Dunnett's or (C, F) Dunn's multiple comparison test between corresponding genotype and *bak1-5*.

A

100 nM flg22

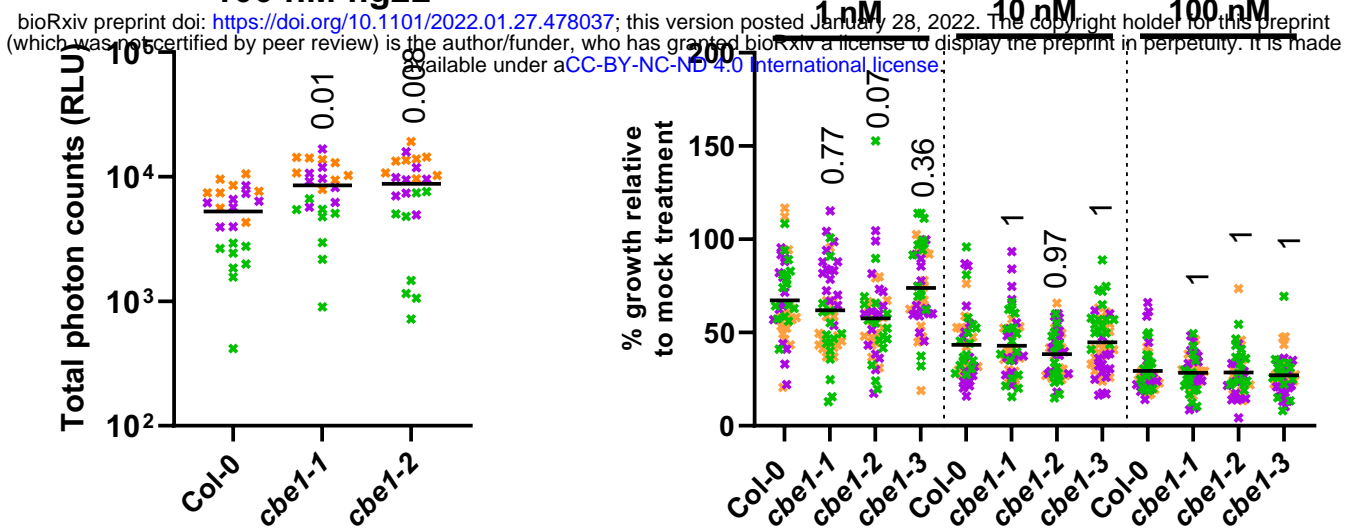

### Figure S4. CBE1 negatively regulates elicitor-induced ROS production.

(A) Total ROS accumulation measured as RLU over 60 min recording after treatment with 100 nM flg22 on leaf discs from 5-week-old plants: Horizontal lines represent the means from 3 independent experiments (n=8). (B) Bacterial growth (CFU/cm<sup>2</sup>) in leaves spray inoculated with 10<sup>7</sup> CFU/mL (OD<sub>600</sub> =0.2) *P. syringae* pv. *tomato* DC3000 COR<sup>-</sup> and sampled at 3 dpi. Horizontal lines represent the means from 4 independent experiments (n=7-8). (C) Growth inhibition represented as percentage of fresh weight in response to 1, 10 or 100 nM flg22 relative to mock treated seedlings. Horizontal lines represent the means from 3 independent experiments (n=16). Numbers above symbols are p-values from (A,B) Dunnett's or (C) Dunn's multiple comparison test between corresponding genotype and *bak1-5*.



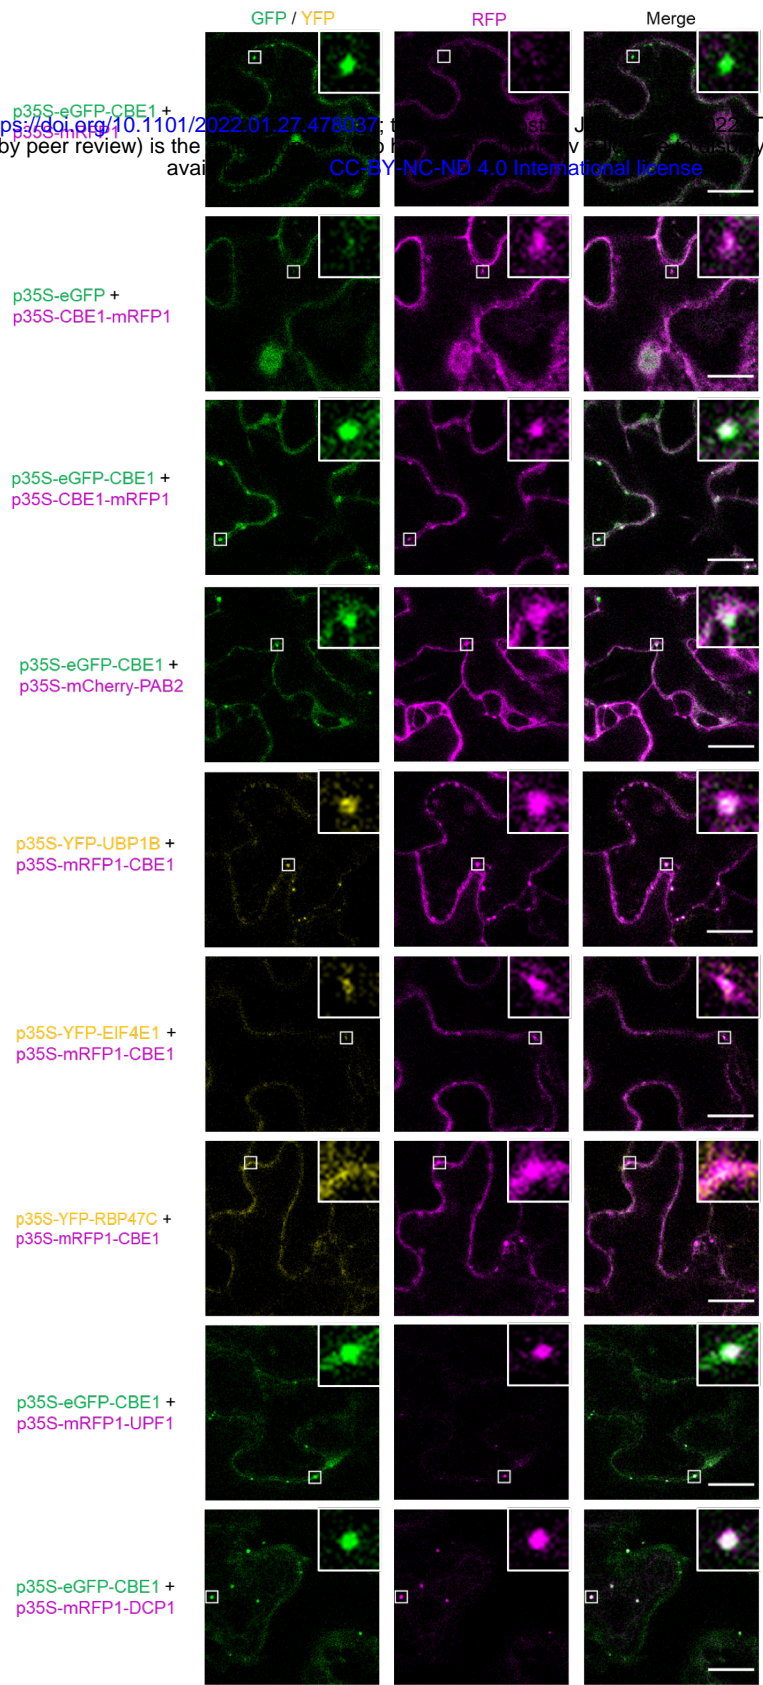

**Figure S5. CBE1 localizes predominantly to processing bodies among ribonucleoprotein complexes.**

Confocal images of green, yellow and red fluorescent proteins. The proteins were transiently co-expressed in *N. benthamiana*. Confocal microscopy on leaf discs was conducted 3 days post-infiltration. Merged pictures show overlay of GFP/YFP and RFP. The scale bar corresponds to 20  $\mu\text{m}$ . An ROI of 25  $\mu\text{m}^2$  is shown by white square and zoomed in on the top right of the images. P-bodies markers: UPF1, DCP1 ; polysomes/stress granules markers: PAB2, EIF4E ; stress granules markers: UB1B, RBP47C.

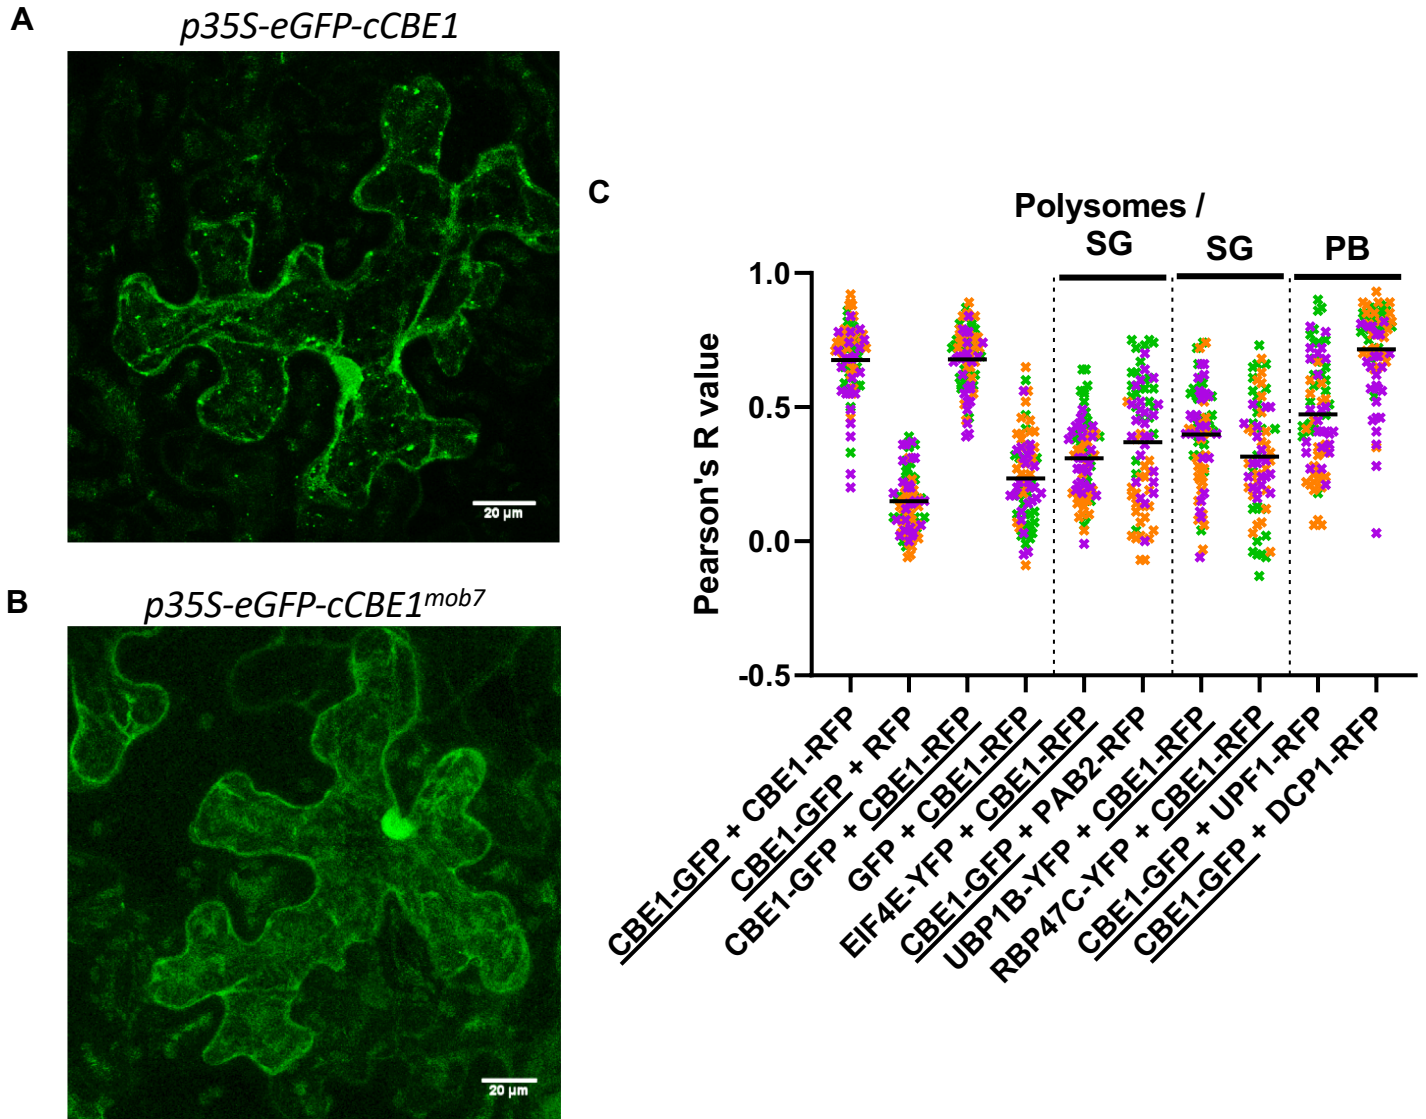

**Figure 4. CBE1 localizes predominantly to processing bodies among ribonucleoprotein complexes.**

(A, B) Confocal images of CBE1-GFP (A) or CBE1<sup>mob7</sup>-GFP (B) after transient expression in *N. benthamiana*. Each picture is a z-stack projection. The scale bar corresponds to 20  $\mu\text{m}$ . (C) Quantitative co-localization analysis for CBE1 with polysomes / stress granules (SG), SG specific and P-bodies (PB) markers after transient co-expression in *N. benthamiana*. The Pearson correlation coefficient (R) was calculated with five ROIs (25  $\mu\text{m}^2$ ) per image (n=5, images) and the proteins underlined refer to the channel used to draw the ROIs.

**A****100 nM elf18**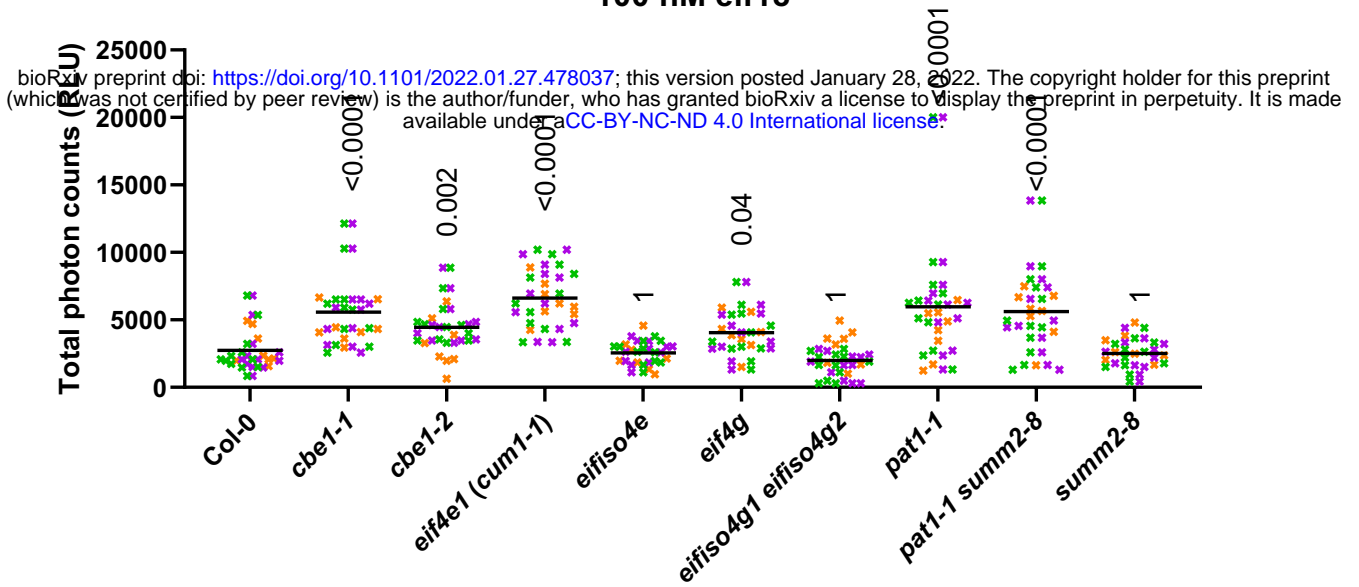**B**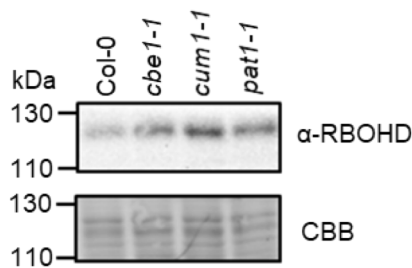

### Figure 5. Translation factor eIF4E and decapping factor PAT1 also play a role in ROS production.

(A) Total ROS accumulation measured as RLU over 60 min recording after treatment with 100 nM elf18 on leaf discs from 5-week-old plants: Horizontal lines represent the means from 3 independent experiments (n=8-12). The symbol colors indicate the different experiments. Numbers above symbols are p-values from Dunn's multiple comparison test between the corresponding genotypes and Col-0. (B) Immunoblot analysis of RBOHD (anti-RBOHD) protein accumulations in 5-week-old Arabidopsis leaves from the corresponding genotypes. Coomassie Brilliant Blue (CBB) stain is shown as loading control. Experiment was repeated twice with similar results.
